# Supplementary material for: Palladium(ii) N,N,O-pincer type complex-mediated dehydrogenative coupling of alcohols to quinazolines
Source: Royal Society of Chemistry journal article supplement (doi:10.1039/d1nj03146e), 2021-01-01
Supplement: d1nj03146e1.pdf [file d1nj03146e1.pdf]

## Supporting Information

### Palladium(II) N,N,O-Pincer Type Complexes Mediated Dehydrogenative Coupling of Alcohols to Quinazolines

Pennamuthiriyar Anandaraj<sup>a</sup>, Rengan Ramesh<sup>\*a</sup> and Poomani Kumaradhas<sup>b</sup>

<sup>a</sup>Centre for Organometallic Chemistry, School of Chemistry, Bharathidasan University, Tiruchirappalli – 620 024, India. E-mail: [ramesh\\_bdu@yahoo.com](mailto:ramesh_bdu@yahoo.com), [rramesh@bdu.ac.in](mailto:rramesh@bdu.ac.in)

<sup>b</sup>Department of Physics, Periyar University, Salem-636011, India.

| S.No. | Contents                                                                           | Page No. |
|-------|------------------------------------------------------------------------------------|----------|
| 1     | X-ray Crystallography procedures.....                                              | S2       |
| 2     | NMR spectra for complexes <b>1-2</b> .....                                         | S3-S4    |
| 3     | Mass spectra for complexes <b>1-2</b> .....                                        | S5-S6    |
| 4     | Crystal data, refinement parameters, selected distances and bond angles.....       | S7, S8   |
| 5     | NMR spectra of quinazoline products.....                                           | S9-S24   |
| 6     | Intermediate for aldehydes, quinazoline characterization data and NMR spectra..... | S25-S27  |
| 7     | Mass spectra of quinazoline intermediates .....                                    | S28      |
| 8     | References.....                                                                    | S29      |

## 1. X-ray Crystallography

A single crystal with high quality and exhibiting good morphology was chosen for X-ray diffraction intensity measurements. The X-ray diffraction intensity data was collected at room temperature (293 K) on a Bruker D8 Quest Eco diffractometer using MoK $\alpha$  radiation (0.71073 Å). During the data collection, the crystal to detector distance was set to 4.5 cm. The data collection was monitored by APEX-III program suit.<sup>1</sup> further, the integration, Lorentz and polarization corrections and merging of data were carried out using SAINT. The absorption correction was performed by SADABS<sup>1</sup> and the data was averaged using SORTAV software.<sup>2</sup> The hydrogen atoms of all C–H, N–H and O–H hydrogen bonds were located from the difference Fourier map and were refined isotropically. Idealized methyl group H-atom position was calculated geometrically [C–H = 0.96 Å]<sup>°</sup> and refined using riding model with Uiso(H) = 1.5 Ueq(C). The structure was solved by direct methods using SHELXS-2014<sup>3</sup> and refined by SHELXL-2014<sup>4</sup> programs incorporated to WINGX package.<sup>5</sup> The ORTEP of the molecule with displacement ellipsoids drawn at 50% probability level are shown in (Fig. 1). The molecular and packing diagrams were generated using the software MERCURY.<sup>6</sup> The CCDC numbers for the complexes **1** and **2** are 1940737 and 1939404 respectively.

## 2. NMR spectra for complexes

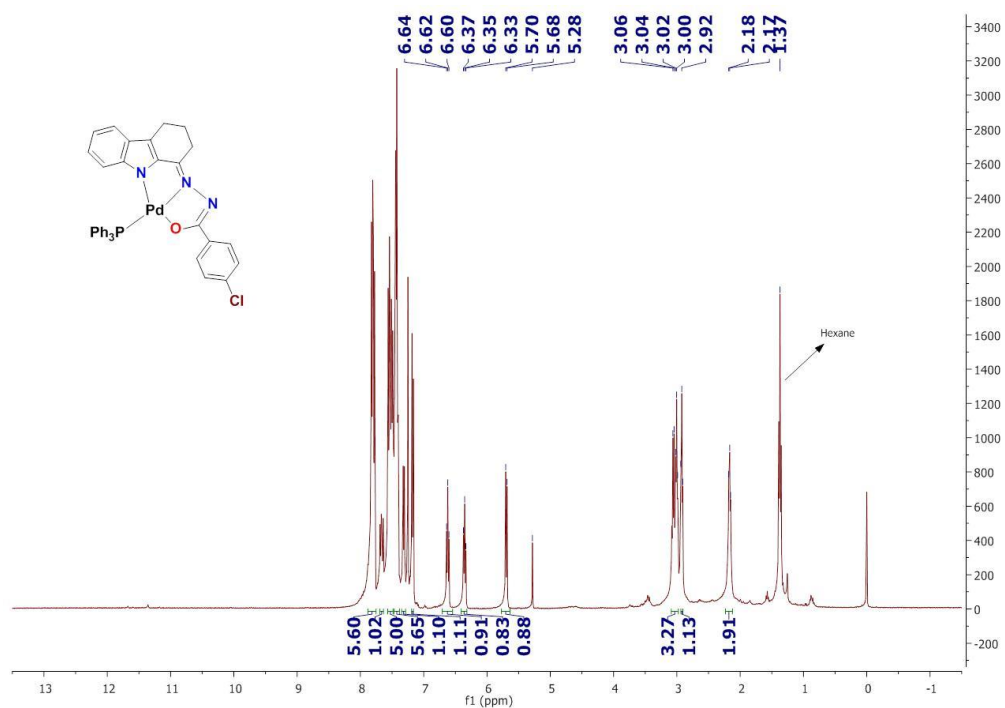

**Figure S1.** <sup>1</sup>H NMR spectrum of complex **1** in CDCl<sub>3</sub> (400 MHz, 300 K).

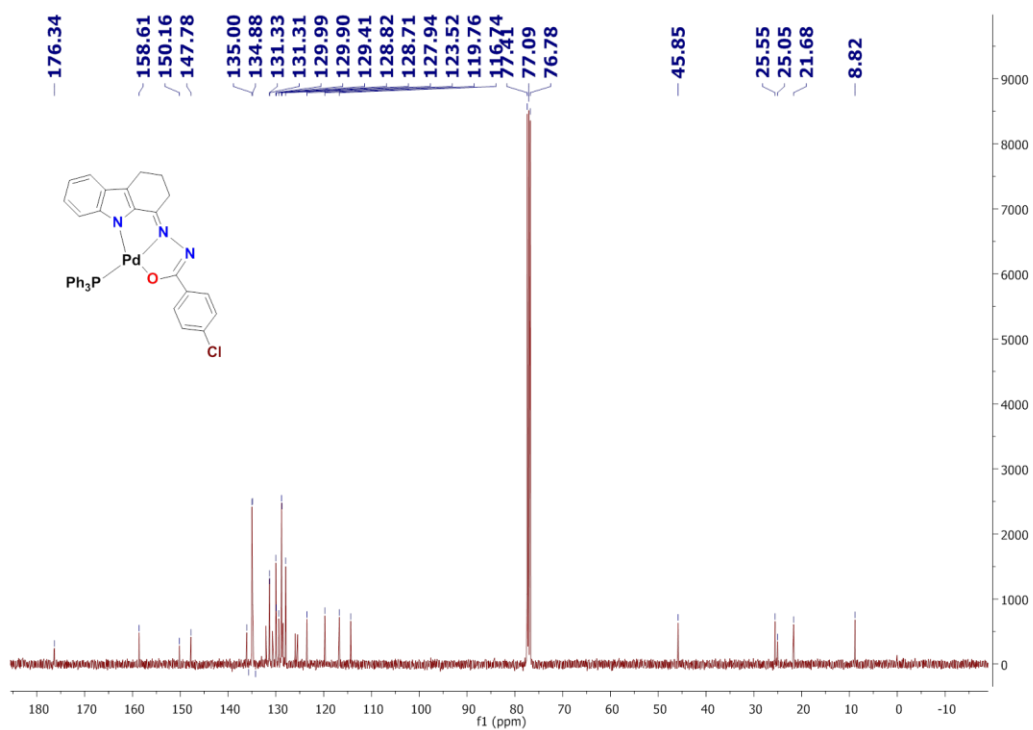

**Figure S2.**  $^{13}\text{C}\{^1\text{H}\}$  NMR spectrum of complex **1** in  $\text{CDCl}_3$  (100 MHz, 300 K).

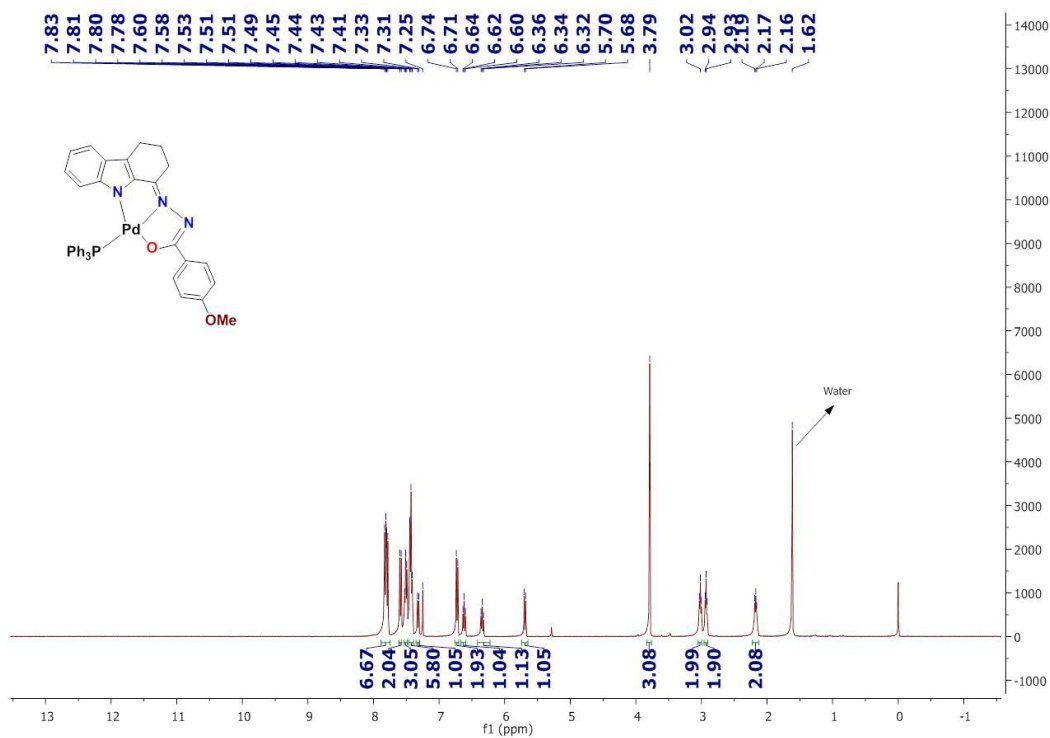

**Figure S3.**  $^1\text{H}$  NMR spectrum of complex **2** in  $\text{CDCl}_3$  (400 MHz, 300 K).

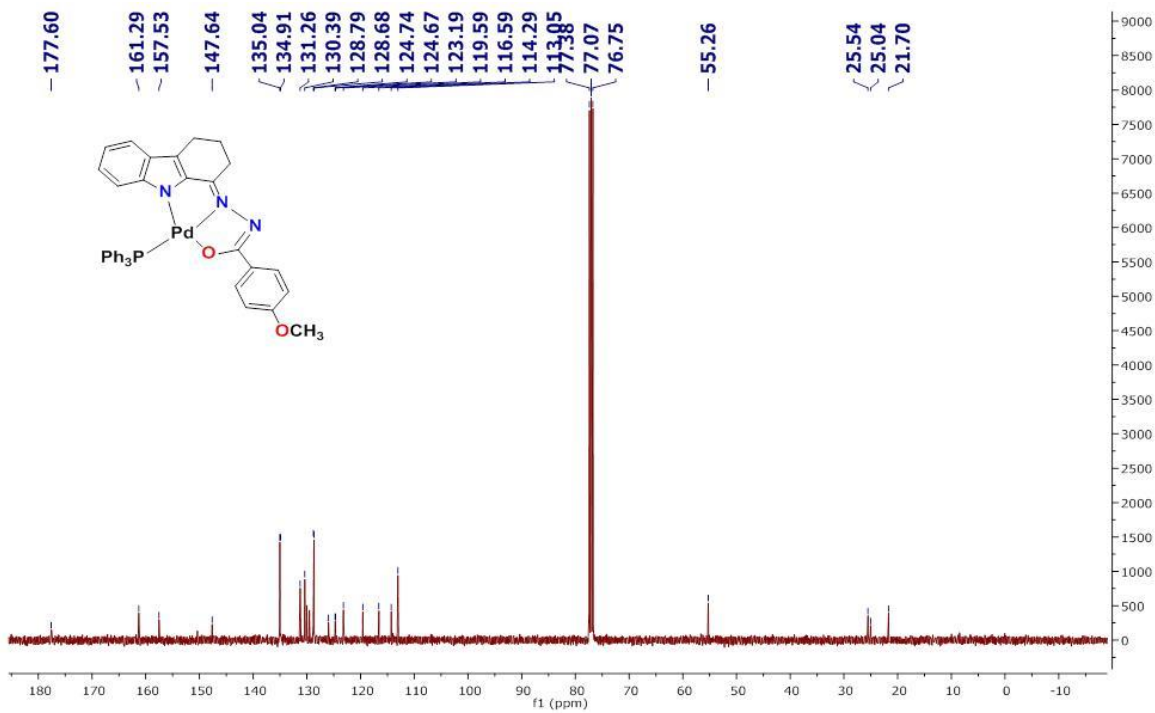

**Figure S4.**  $^{13}\text{C}\{^1\text{H}\}$  NMR spectrum of complex **2** in  $\text{CDCl}_3$  (100 MHz, 300 K).

### 3. Mass spectra of complexes

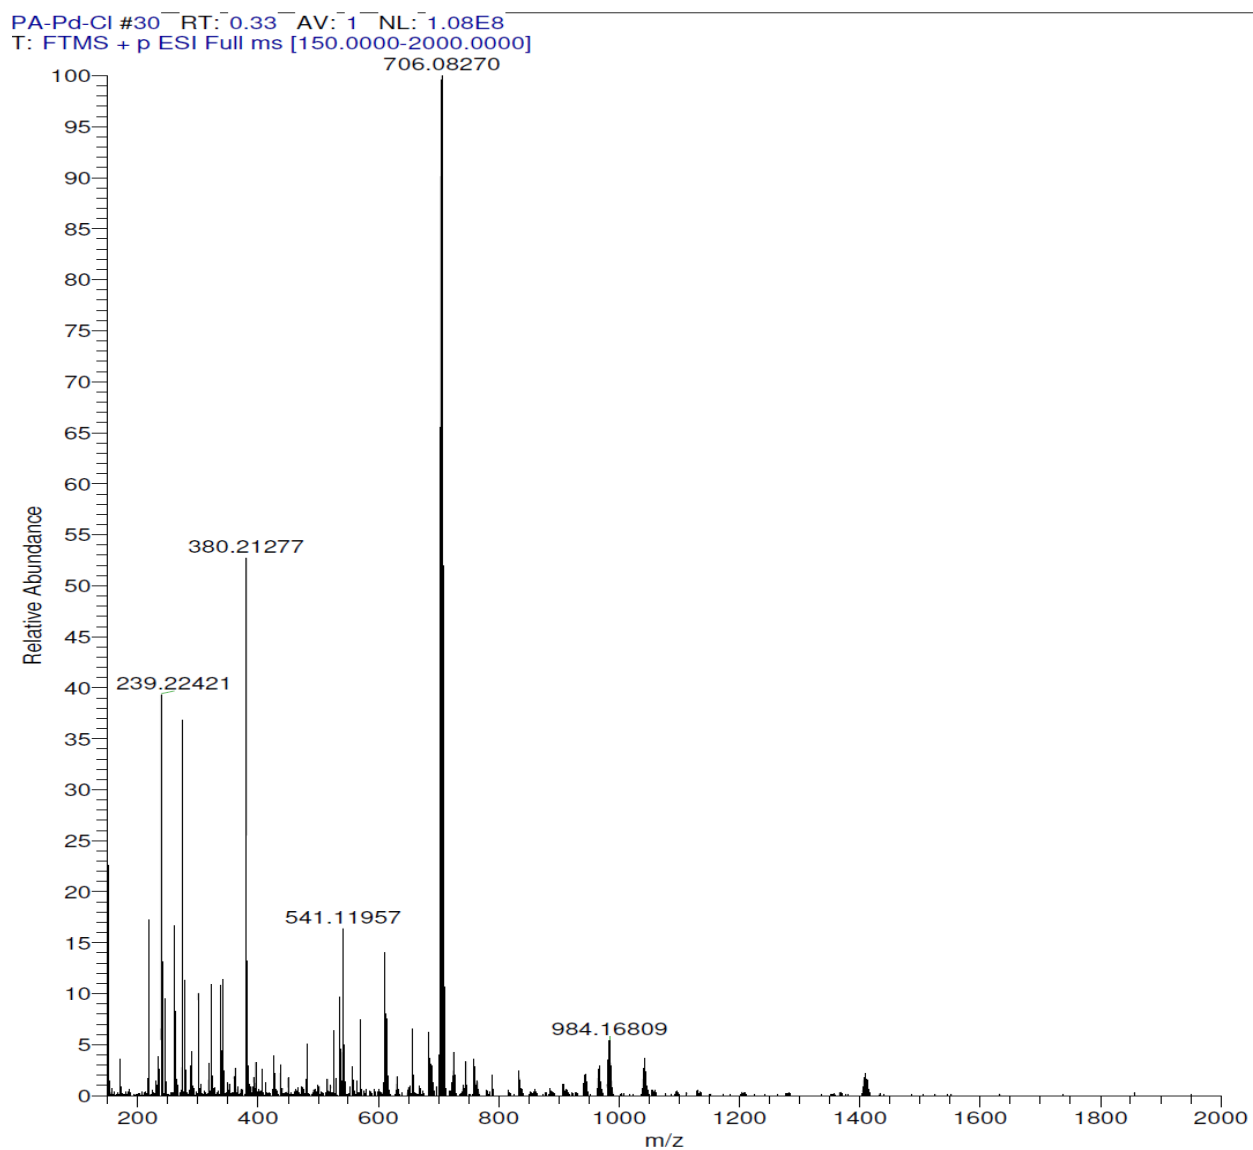

Figure S5. HRMS spectrum of complex 1

2-CH3 #43 RT: 0.45 AV: 1 NL: 8.03E6  
T: FTMS + p ESI Full ms [150.0000-1000.0000]

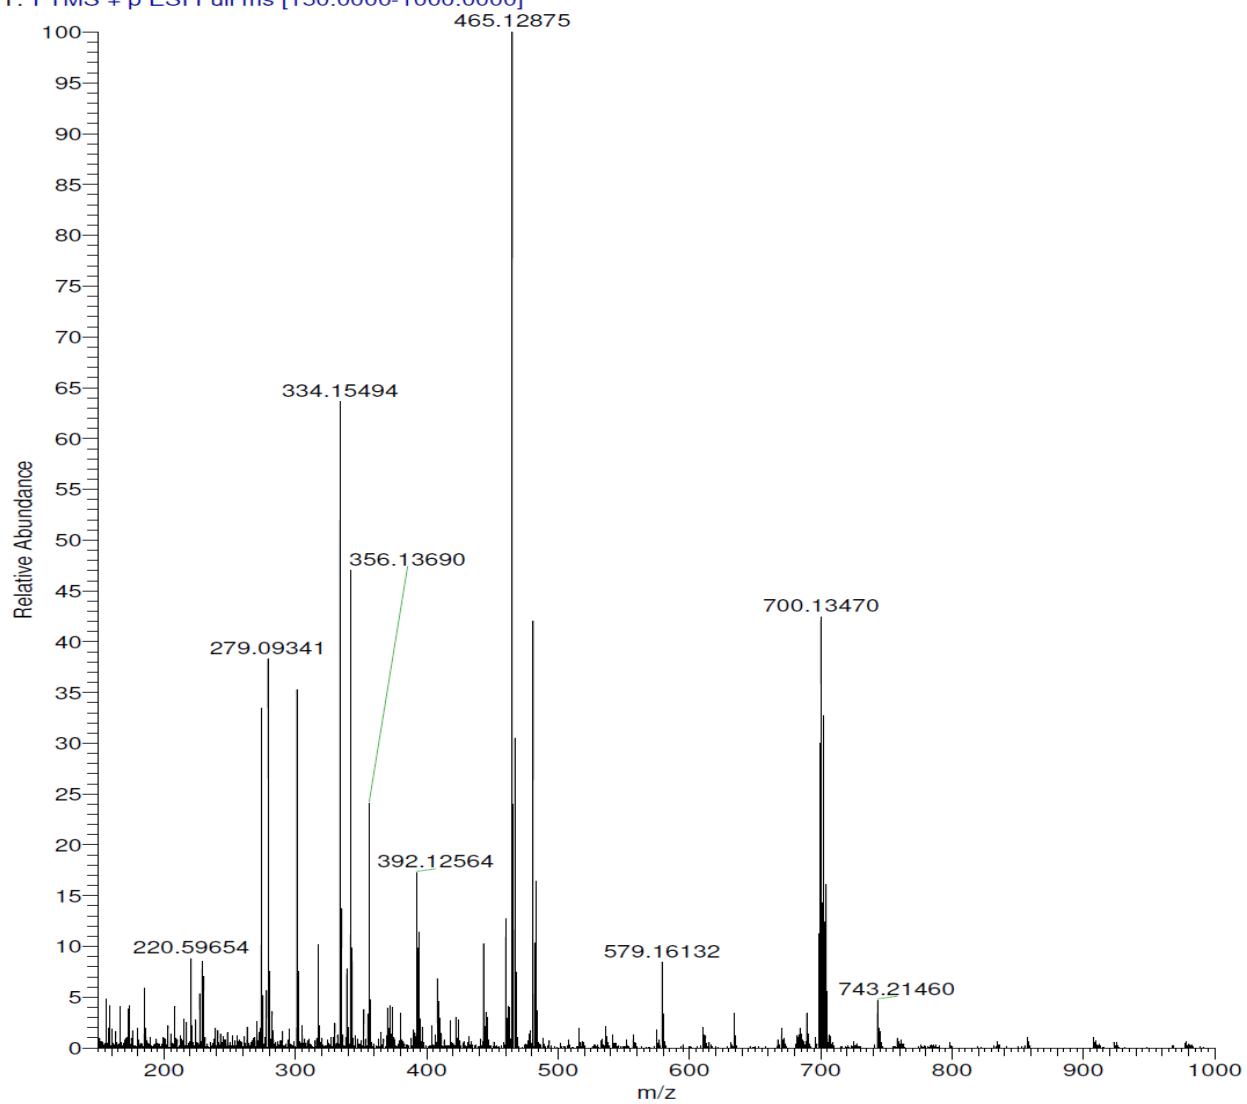

Figure S6. HRMS spectrum of complex 2

#### 4. Crystal data, and refinement parameters

| Identification code                            | Complex 1                                                           | Complex 2                                                         |
|------------------------------------------------|---------------------------------------------------------------------|-------------------------------------------------------------------|
| Empirical formula                              | C <sub>38</sub> H <sub>31</sub> Cl <sub>3</sub> N <sub>3</sub> OPPd | C <sub>38</sub> H <sub>32</sub> N <sub>3</sub> O <sub>2</sub> PPd |
| Formula weight                                 | 789.38                                                              | 700.04                                                            |
| Temperature/K                                  | 293(2)                                                              | 293(2)                                                            |
| Crystal system                                 | Triclinic                                                           | Monoclinic                                                        |
| Space group                                    | P-1                                                                 | P21/c                                                             |
| a/Å                                            | 11.6578(4)                                                          | 11.3299(3)                                                        |
| b/Å                                            | 12.3412(5)                                                          | 7.9601(2)                                                         |
| c/Å                                            | 13.2461(5)                                                          | 35.2801(8)                                                        |
| α/°                                            | 112.1310(10)                                                        | 90                                                                |
| β/°                                            | 97.3090(10)                                                         | 98.1770(10)                                                       |
| γ/°                                            | 99.9970(10)                                                         | 90                                                                |
| Volume/Å <sup>3</sup>                          | 1699.33(11)                                                         | 3149.46(14)                                                       |
| Z                                              | 2                                                                   | 4                                                                 |
| ρ <sub>calc</sub> /cm <sup>3</sup>             | 1.543                                                               | 1.476                                                             |
| μ/mm <sup>-1</sup>                             | 0.865                                                               | 0.68                                                              |
| F(000)                                         | 800.0                                                               | 1432.0                                                            |
| Crystal size/mm <sup>3</sup>                   | 0.293 × 0.287 ×<br>0.22                                             | 0.431 × 0.387 ×<br>0.242                                          |
| Radiation                                      | MoKα (λ =<br>0.71073)                                               | MoKα (λ =<br>0.71073)                                             |
| 2θ range for data<br>collection/°              | 5.752 to 56.526                                                     | 5.62 to 56.56                                                     |
| Index ranges                                   | -15 ≤ h ≤ 11, -16 ≤<br>k ≤ 16, -17 ≤ l ≤ 12                         | -15 ≤ h ≤ 14, -10 ≤<br>k ≤ 7, -45 ≤ l ≤ 46                        |
| Reflections collected                          | 8358                                                                | 27474                                                             |
| Independent reflections                        | 8358 [Rint =<br>0.0095, Rsigma =<br>0.0438]                         | 7687<br>[Rint = 0.0194,<br>Rsigma = 0.0189]                       |
| Data/restraints/<br>parameters                 | 8358/0/540                                                          | 7687/0/523                                                        |
| Goodness-of-fit on F <sup>2</sup>              | 0.983                                                               | 1.230                                                             |
| Final R indexes<br>[I ≥ 2σ (I)]                | R1 = 0.0295, wR2<br>= 0.0754                                        | R1 = 0.0357,<br>wR2 = 0.0727                                      |
| Final R indexes<br>[all data]                  | R1 = 0.0349, wR2<br>= 0.0779                                        | R1 = 0.0394,<br>wR2 = 0.0740                                      |
| Largest diff. peak/hole<br>/ e Å <sup>-3</sup> | 0.63/-0.48                                                          | 0.34/-0.74                                                        |

**Table S2** Selected bond distances and bond angles

|                           | <b>Complex 1</b> | <b>Complex 2</b> |
|---------------------------|------------------|------------------|
| <b>Bond distances (Å)</b> |                  |                  |
| Pd(1)-P                   | 2.2924(4)        | 2.2824(6)        |
| Pd (1)-O(1)               | 2.032(2)         | 2.017(1)         |
| Pd (1)-N(1)               | 2.048(2)         | 2.038(2)         |
| Pd (1)-N(2)               | 1.991(1)         | 1.986(2)         |
| <b>Bond angles (°)</b>    |                  |                  |
| O(1)- Pd(1)-P             | 97.07(4)         | 94.33(5)         |
| O(1)- Pd(1)-N(1)          | 159.26(7)        | 159.71(7)        |
| N(1)- Pd(1)-P             | 103.67(5)        | 105.92(5)        |
| N(2)- Pd(1)-P             | 174.60(5)        | 171.63(5)        |
| N(2)- Pd(1)-O(1)          | 77.67(6)         | 77.86(7)         |
| N(2)- Pd(1)-N(1)          | 81.61(7)         | 81.98(7)         |



## 5. NMR spectra of quinazoline products

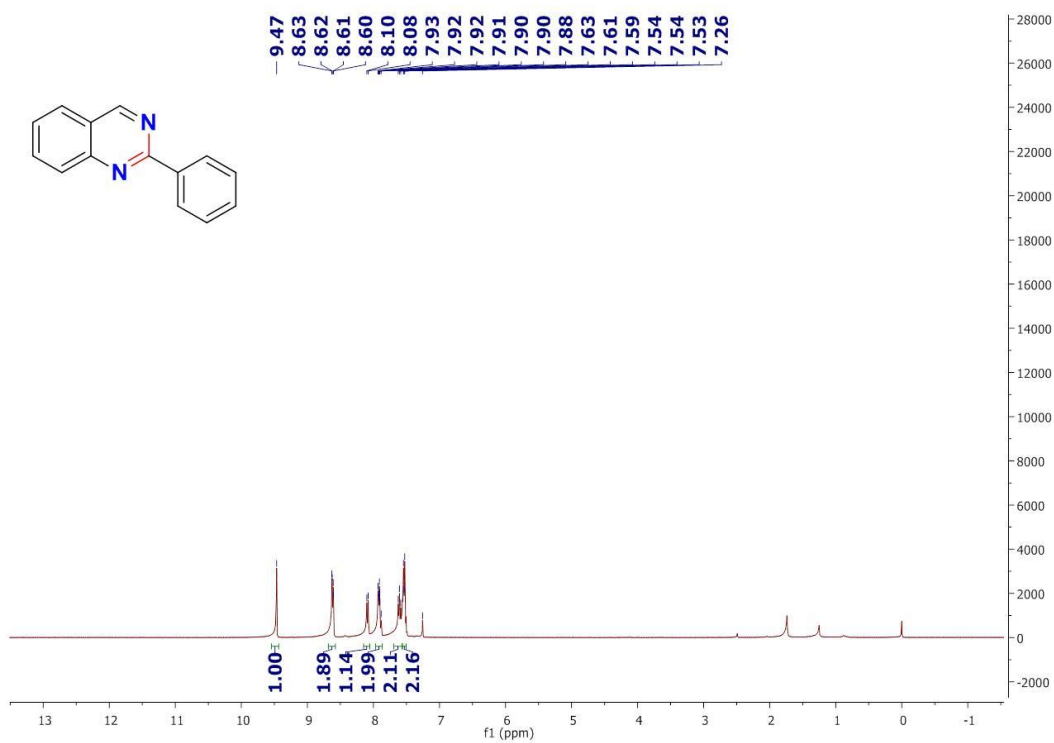

Figure S7.  $^1\text{H}$  NMR spectrum of 3a in  $\text{CDCl}_3$  (400 MHz, 300 K).

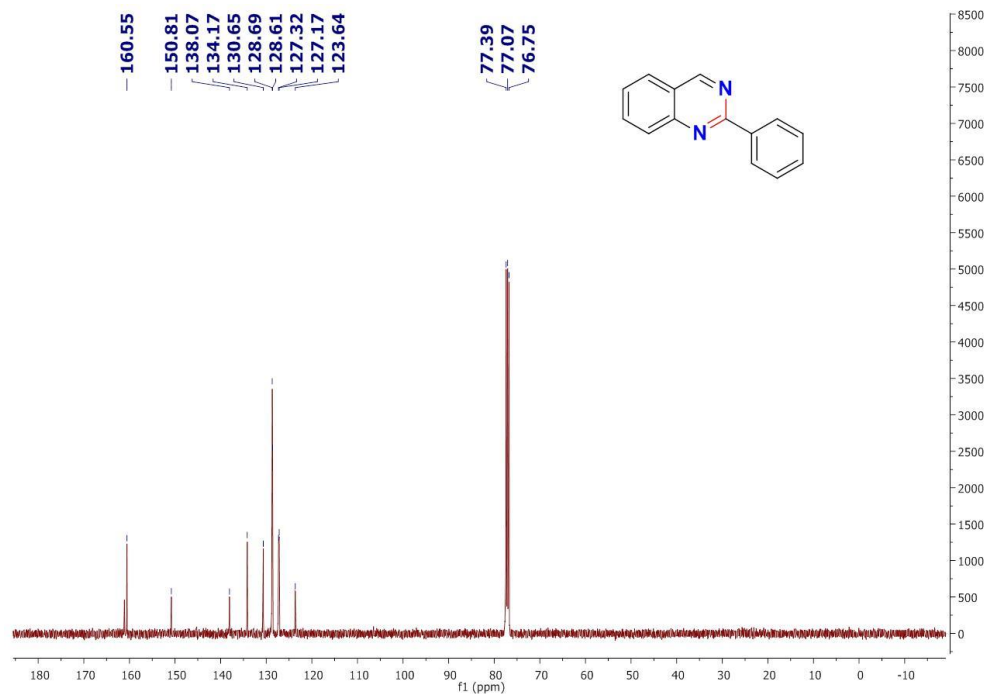

Figure S8.  $^{13}\text{C}\{^1\text{H}\}$  NMR spectrum of 3a in  $\text{CDCl}_3$  (100 MHz, 300 K).

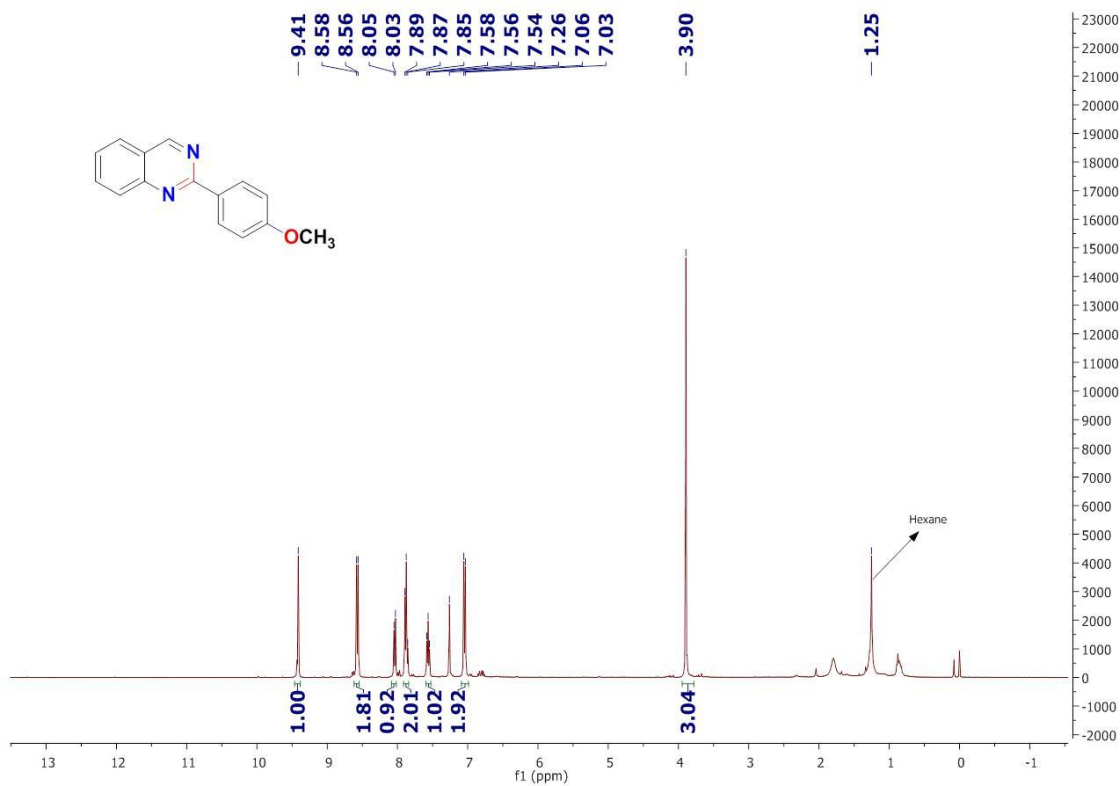

**Figure S9.**  $^1\text{H}$  NMR spectrum of **3b** in  $\text{CDCl}_3$  (400 MHz, 300 K).

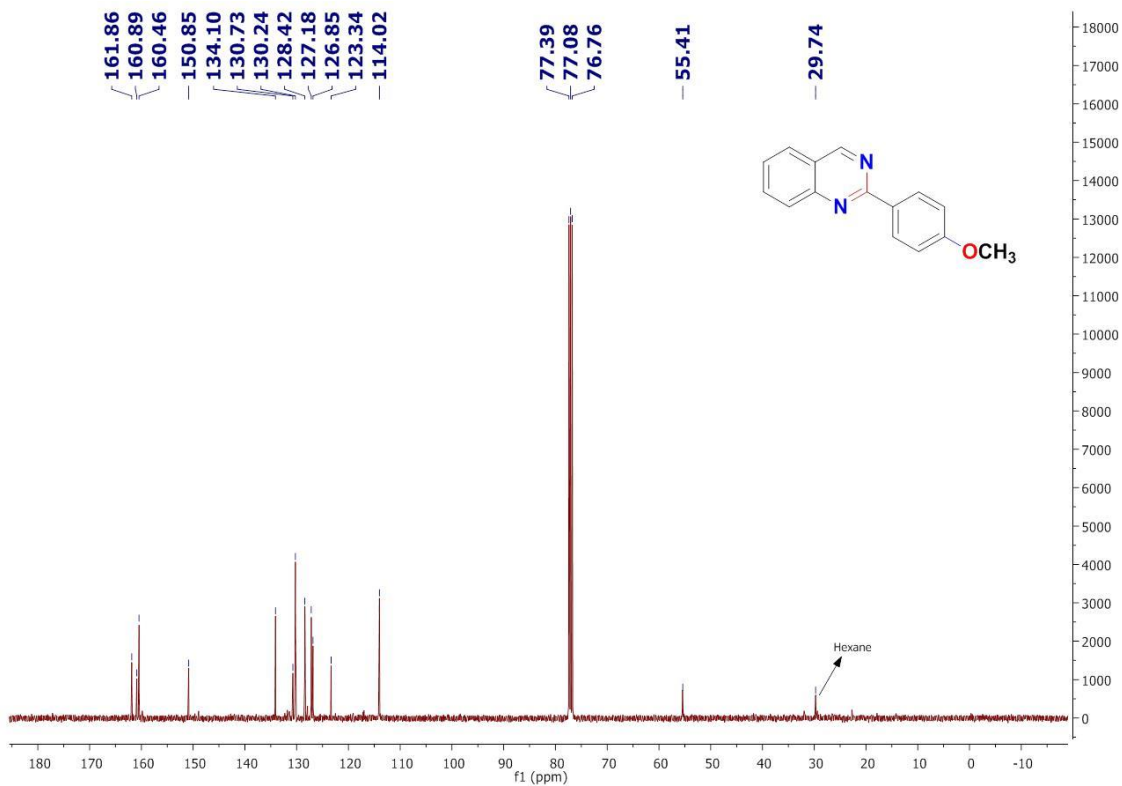

**Figure S10.**  $^{13}\text{C}\{^1\text{H}\}$  NMR spectrum of **3b** in  $\text{CDCl}_3$  (100 MHz, 300 K).

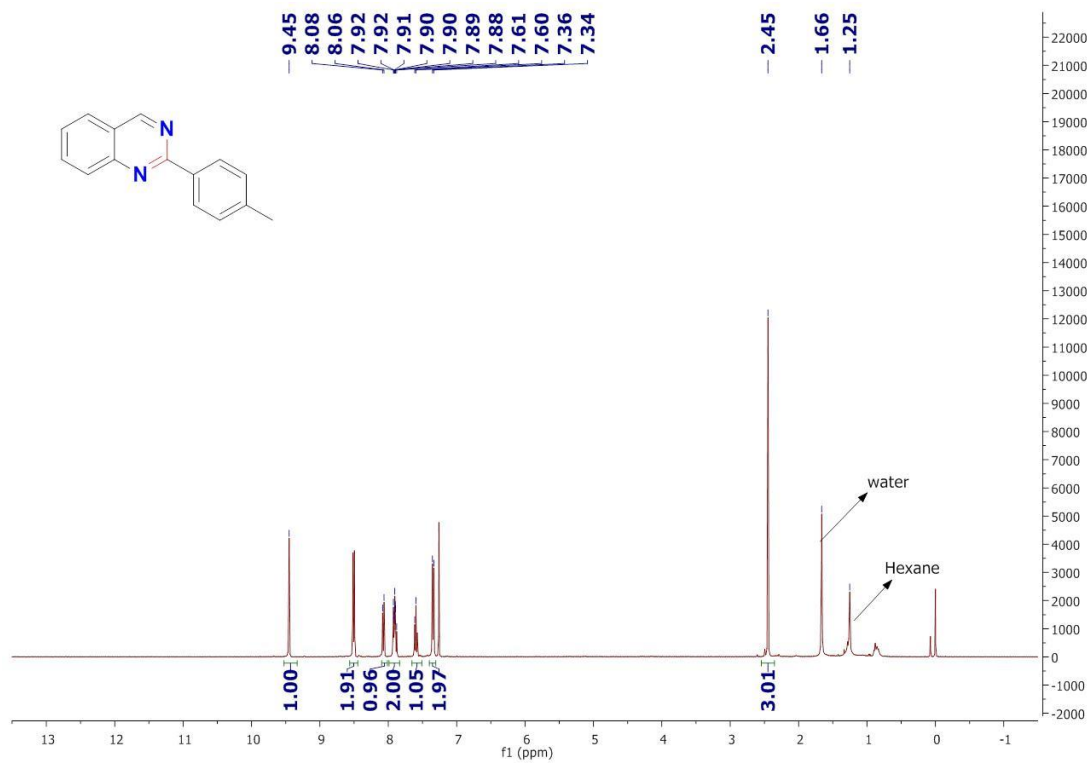

Figure S11.  $^1\text{H}$  NMR spectrum of **3c** in  $\text{CDCl}_3$  (400 MHz, 300 K).

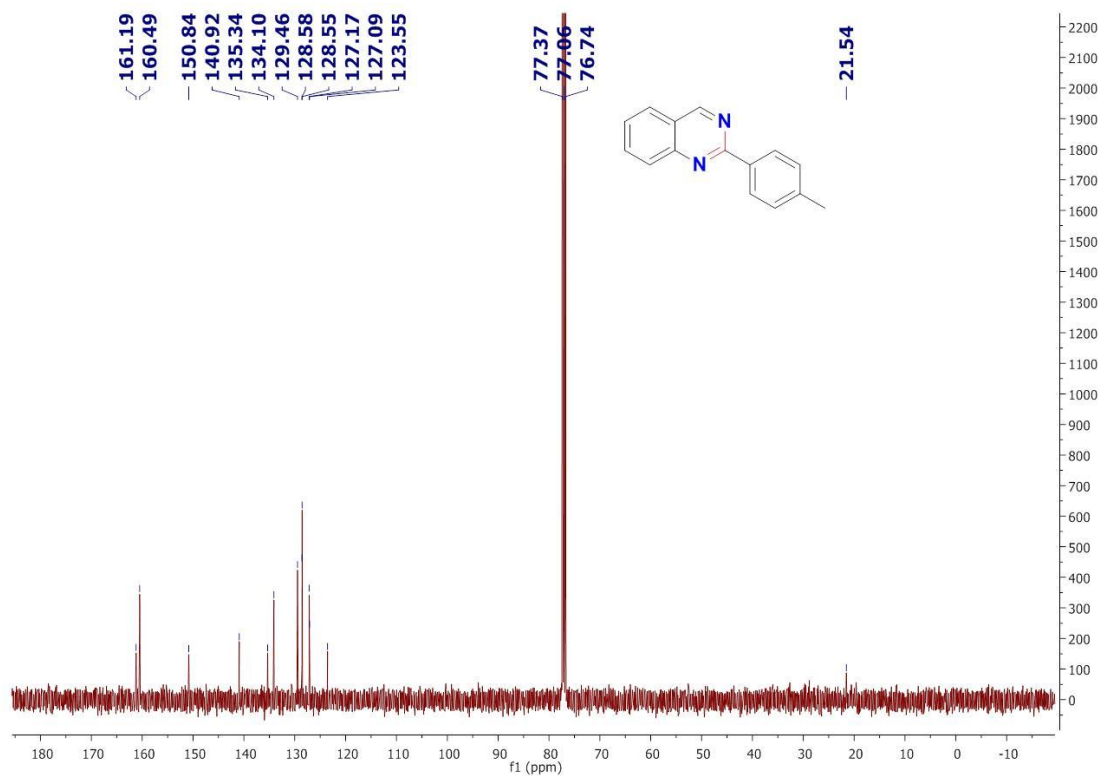

Figure S12.  $^{13}\text{C}\{^1\text{H}\}$  NMR spectrum of **3c** in  $\text{CDCl}_3$  (100 MHz, 300 K).

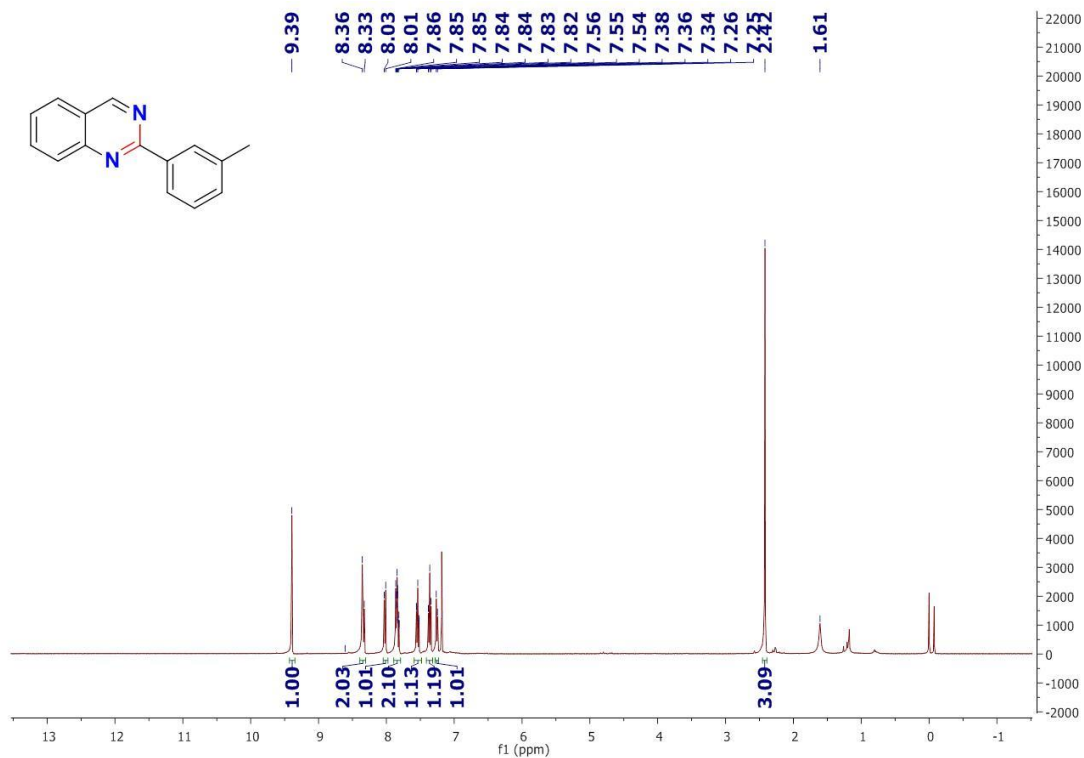

Figure S13.  $^1\text{H}$  NMR spectrum of **3d** in  $\text{CDCl}_3$  (400 MHz, 300 K)

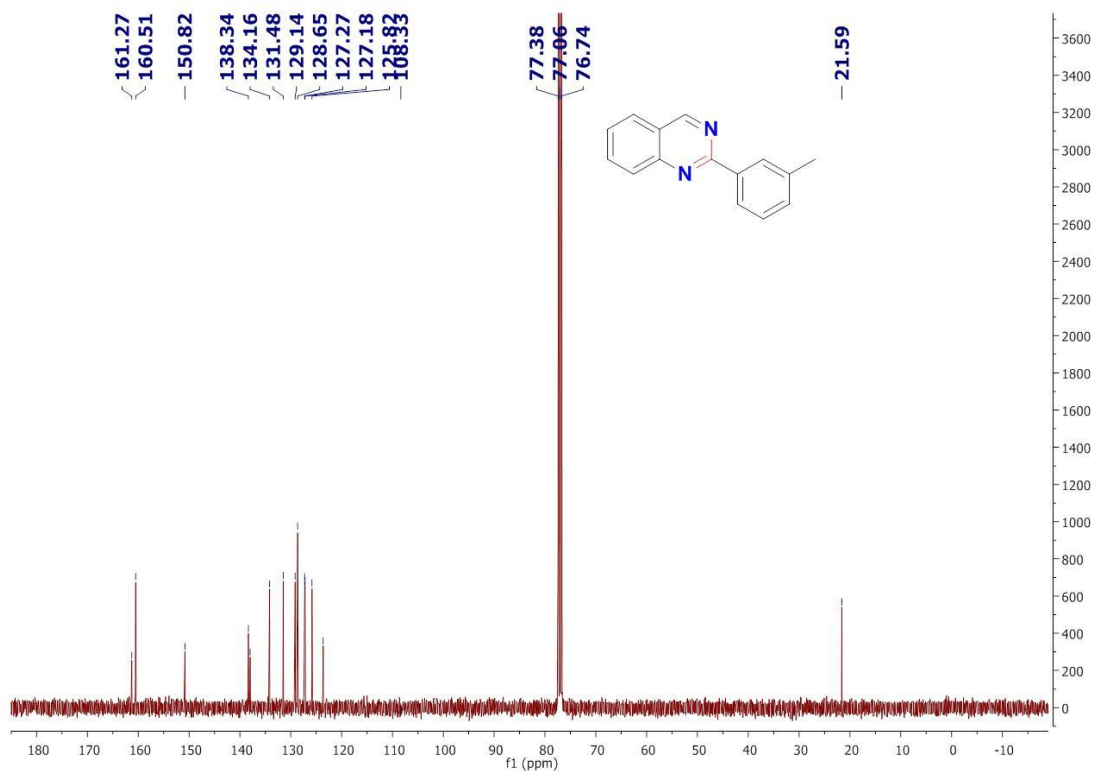

Figure S14.  $^{13}\text{C}\{^1\text{H}\}$  NMR spectrum of **3d** in  $\text{CDCl}_3$  (100 MHz, 300 K).

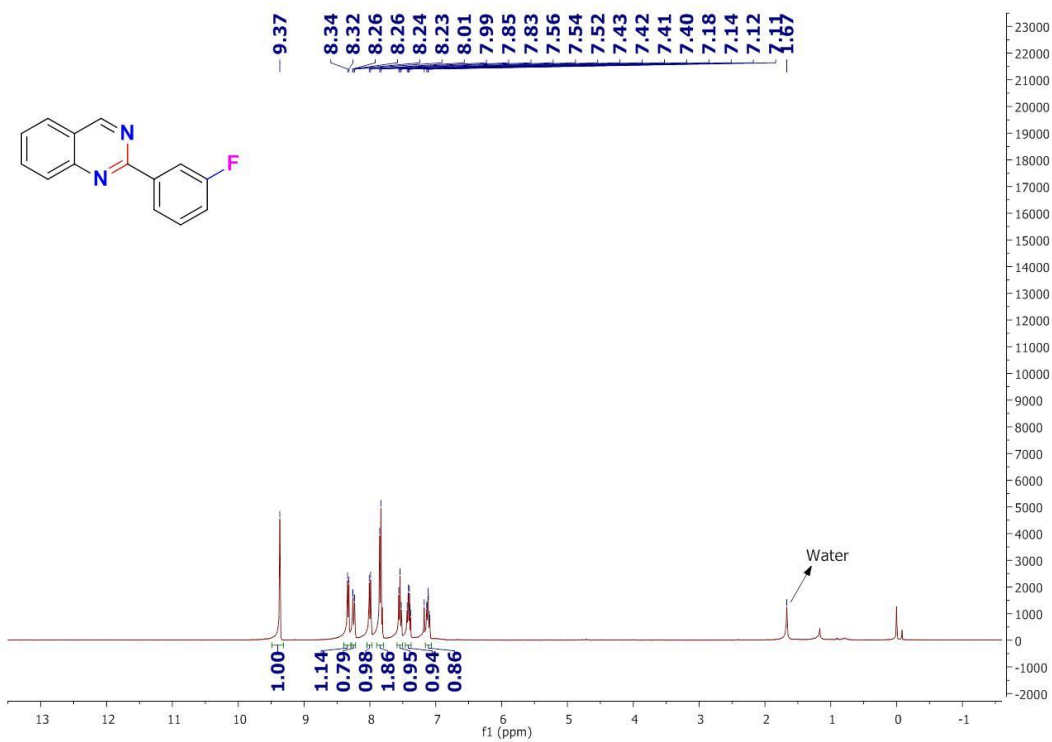

Figure S15.  $^1\text{H}$  NMR spectrum of **3e** in  $\text{CDCl}_3$  (400 MHz, 300 K).

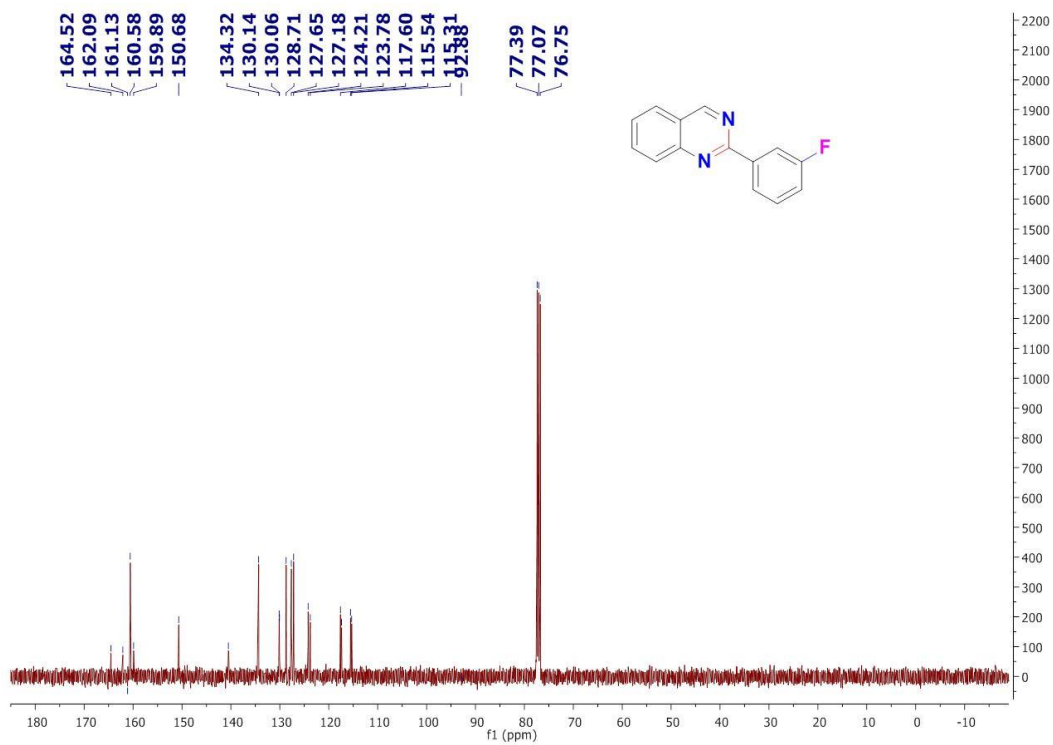

Figure S16.  $^{13}\text{C}\{^1\text{H}\}$  NMR spectrum of **3e** in  $\text{CDCl}_3$  (100 MHz, 300 K).

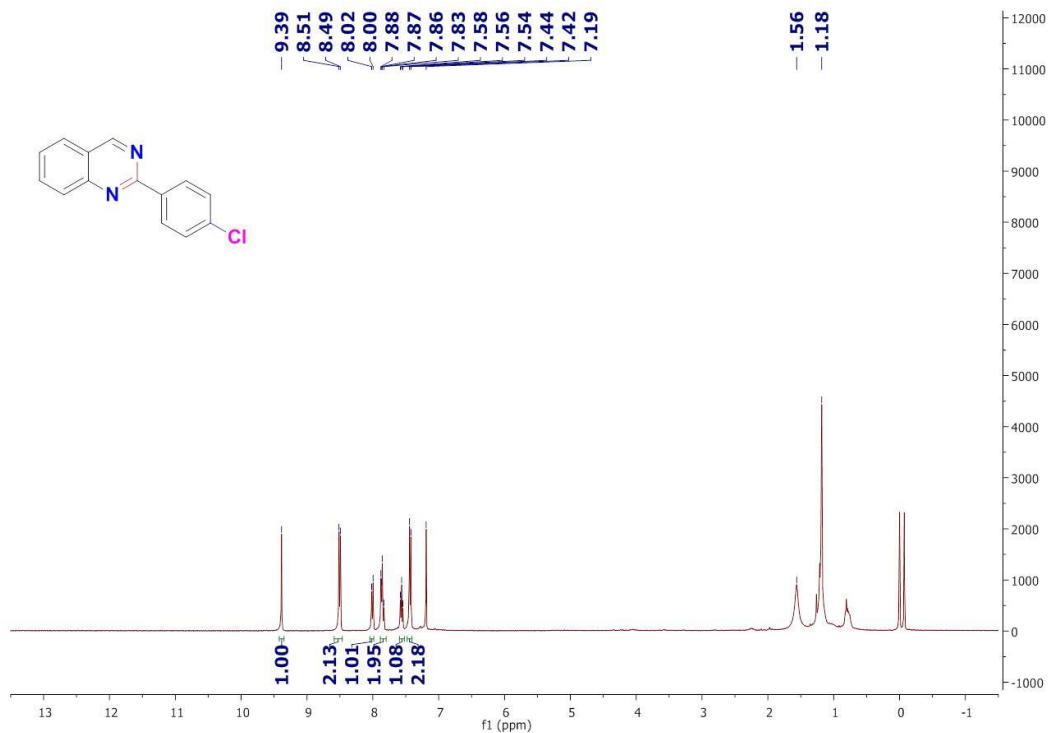

Figure S17.  $^1\text{H}$  NMR spectrum of **3f** in  $\text{CDCl}_3$  (400 MHz, 300 K).

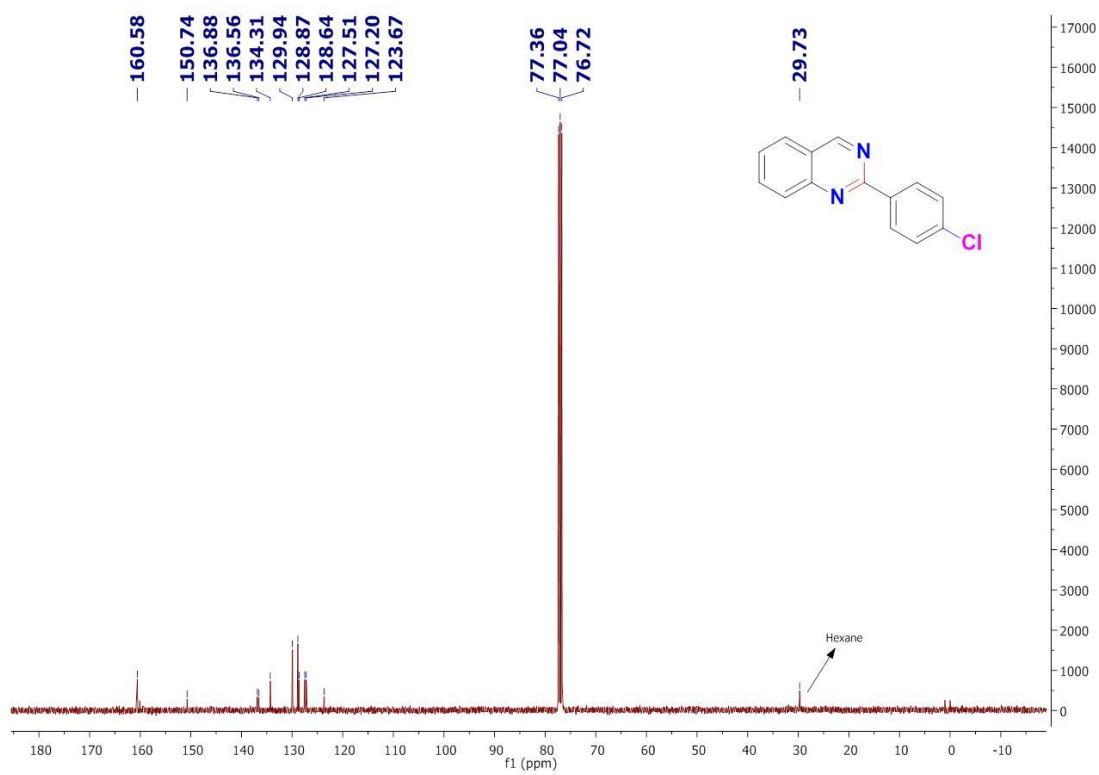

Figure S18.  $^{13}\text{C}\{^1\text{H}\}$  NMR spectrum of **3f** in  $\text{CDCl}_3$  (100 MHz, 300 K).

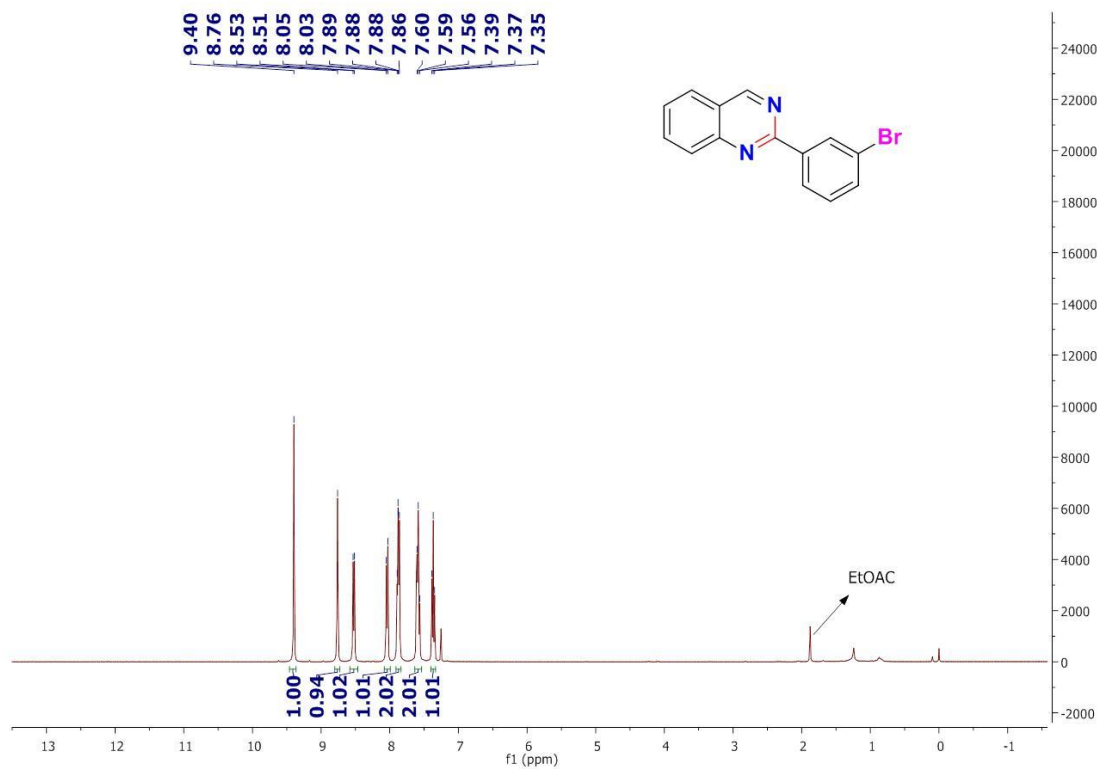

Figure S19.  $^1\text{H}$  NMR spectrum of **3g** in  $\text{CDCl}_3$ (400 MHz, 300 K).

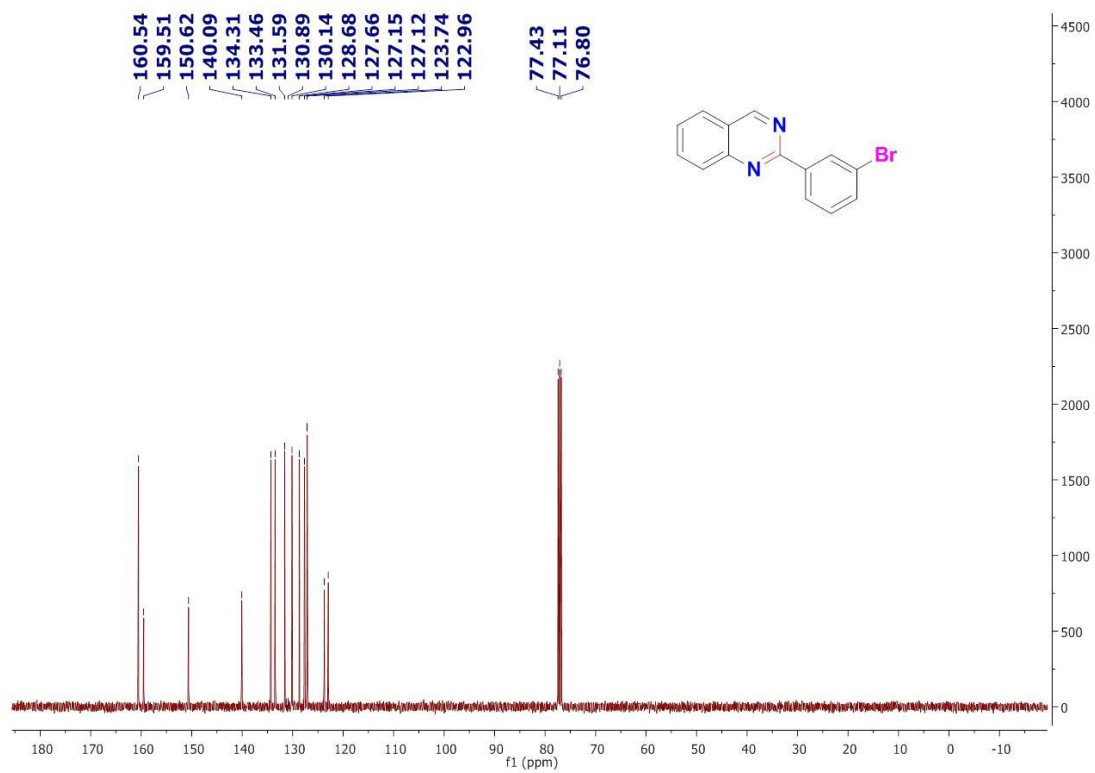

Figure S20.  $^{13}\text{C}\{^1\text{H}\}$  NMR spectrum of **3g** in  $\text{CDCl}_3$ (100 MHz, 300 K).

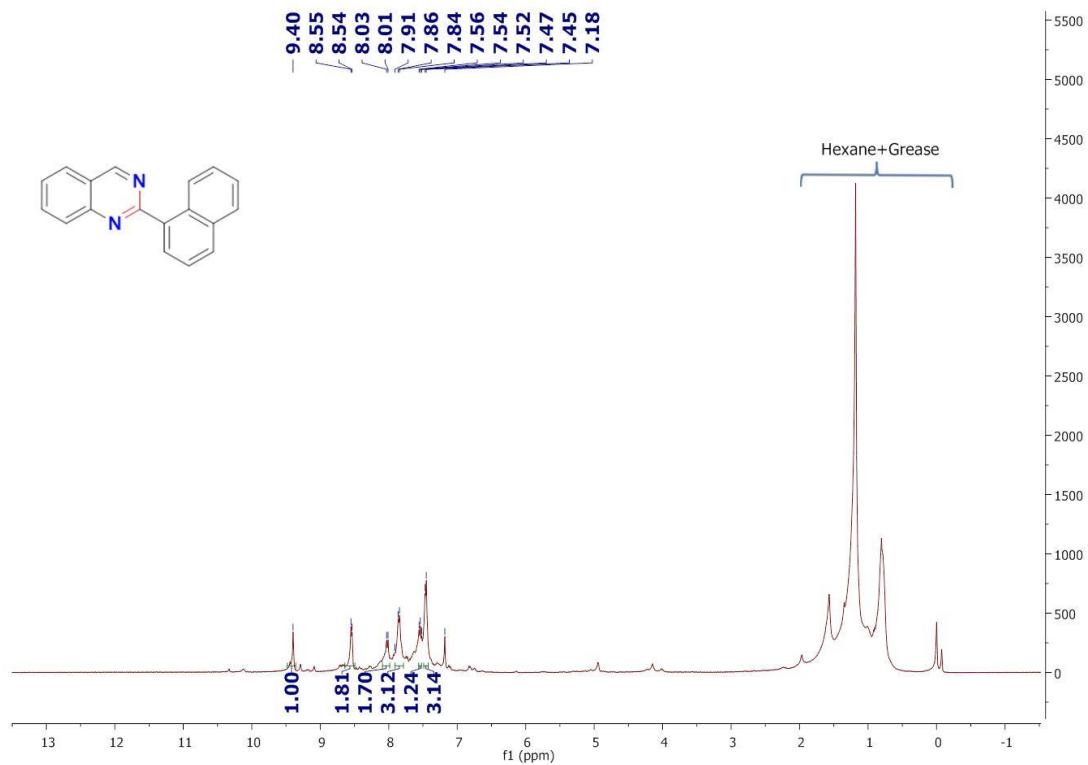

Figure S21.  $^1\text{H}$  NMR spectrum of **3h** in  $\text{CDCl}_3$  (400 MHz, 300 K).

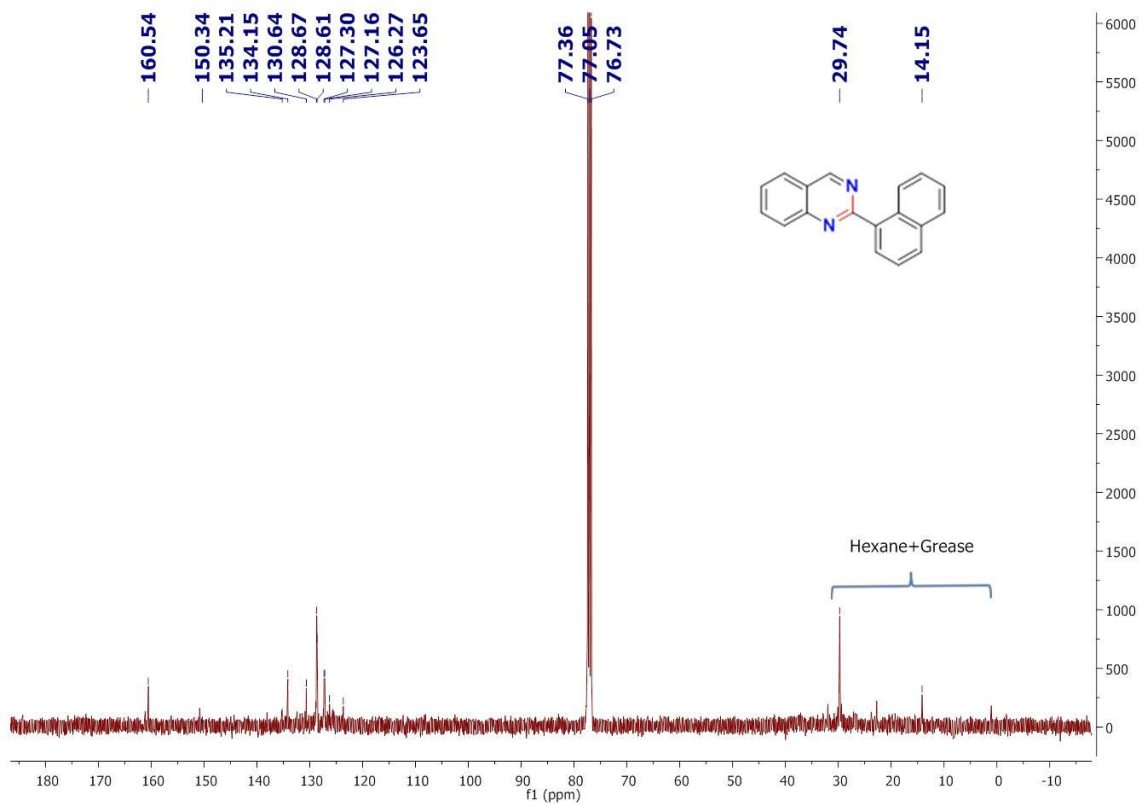

Figure S22.  $^{13}\text{C}\{^1\text{H}\}$  NMR spectrum of **3h** in  $\text{CDCl}_3$  (100 MHz, 300 K).



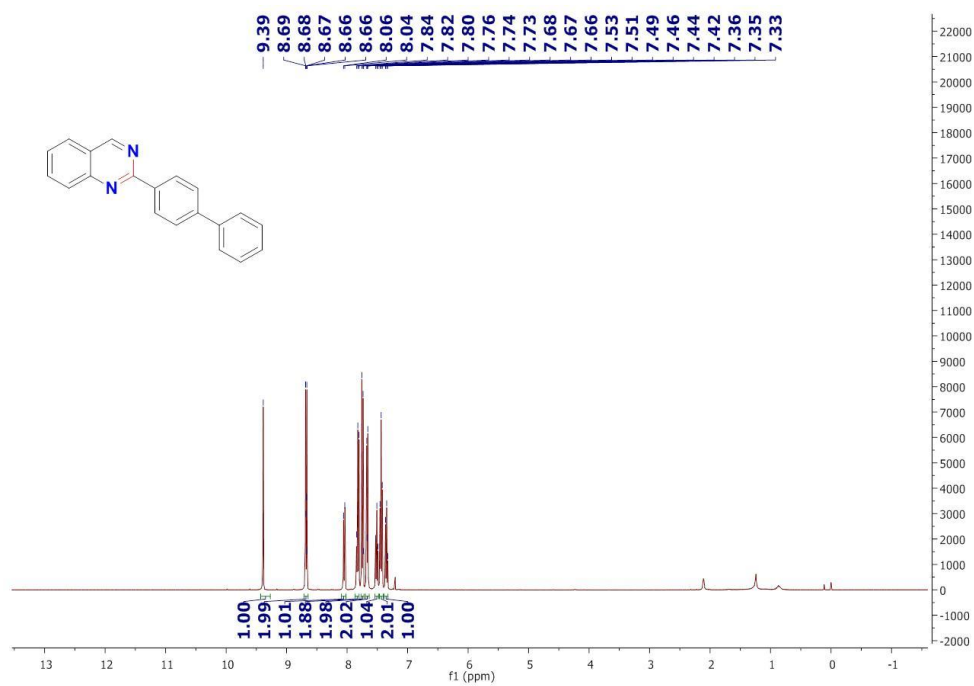

**FigureS23.**  $^1\text{H}$  NMR spectrum of **3i** in  $\text{CDCl}_3$ (400 MHz, 300 K)

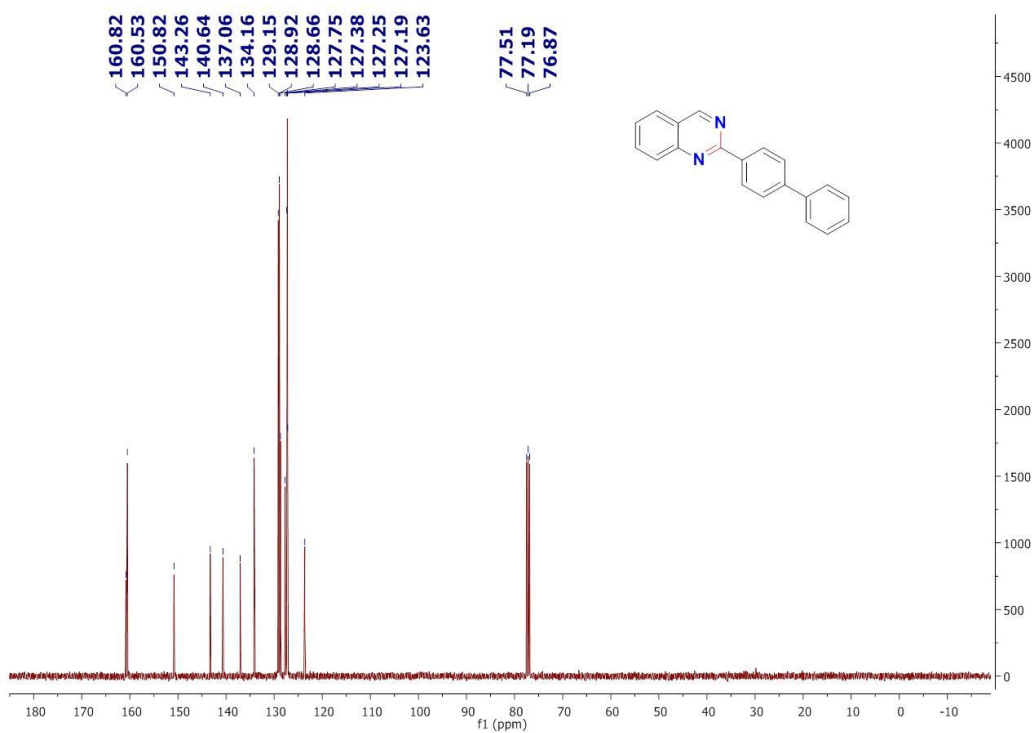

**Figure S24.**  $^{13}\text{C}\{^1\text{H}\}$  NMR spectrum of **3i** in  $\text{CDCl}_3$ (100 MHz, 300 K).

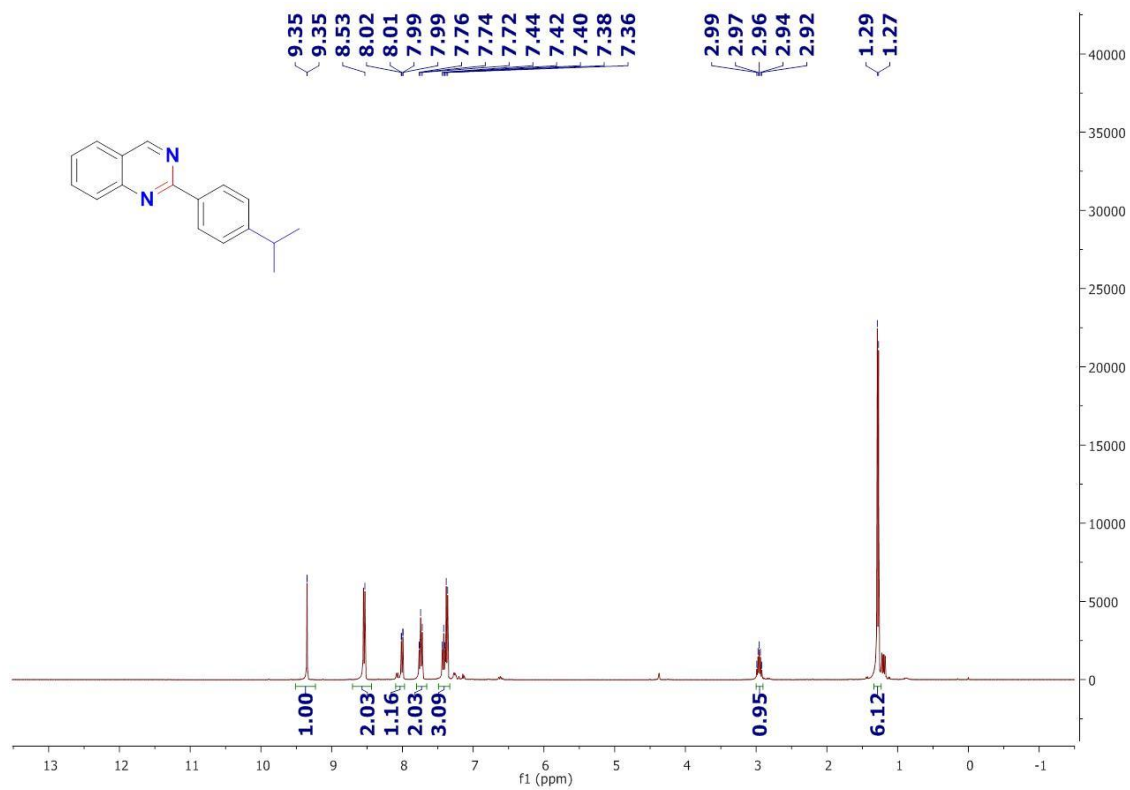

Figure S25.  $^1\text{H}$  NMR spectrum of **3j** in  $\text{CDCl}_3$  (400 MHz, 300 K).

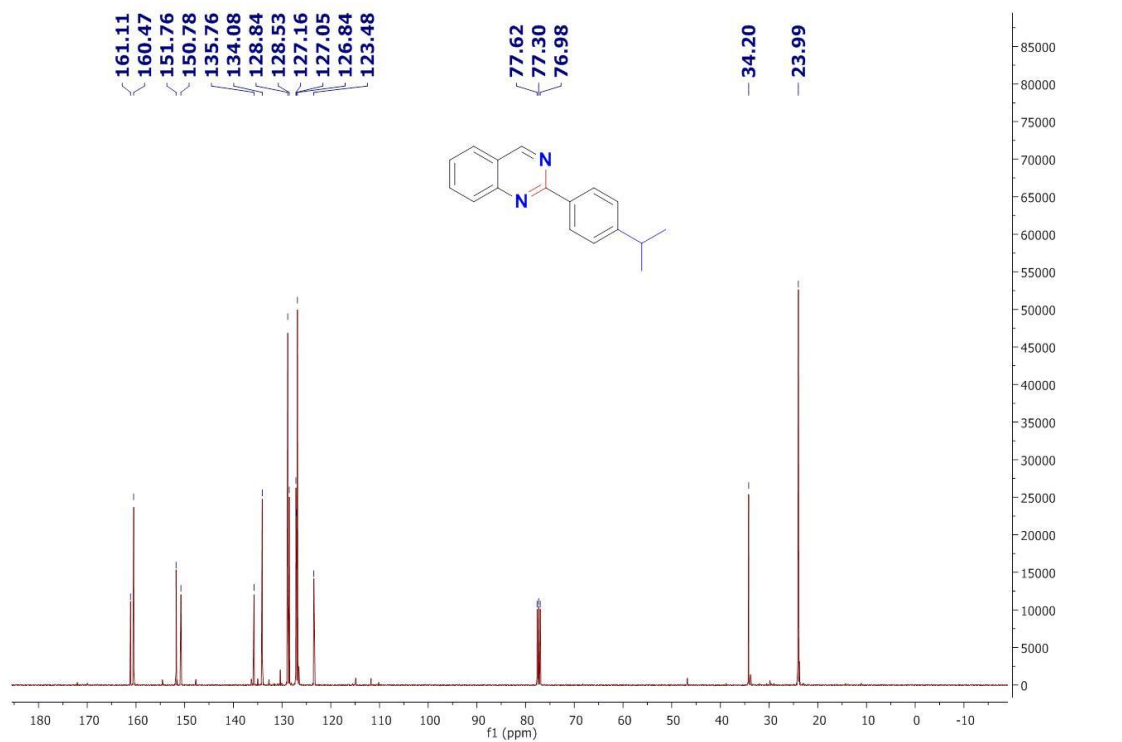

Figure S26.  $^{13}\text{C}\{^1\text{H}\}$  NMR spectrum of **3j** in  $\text{CDCl}_3$  (100 MHz, 300 K).

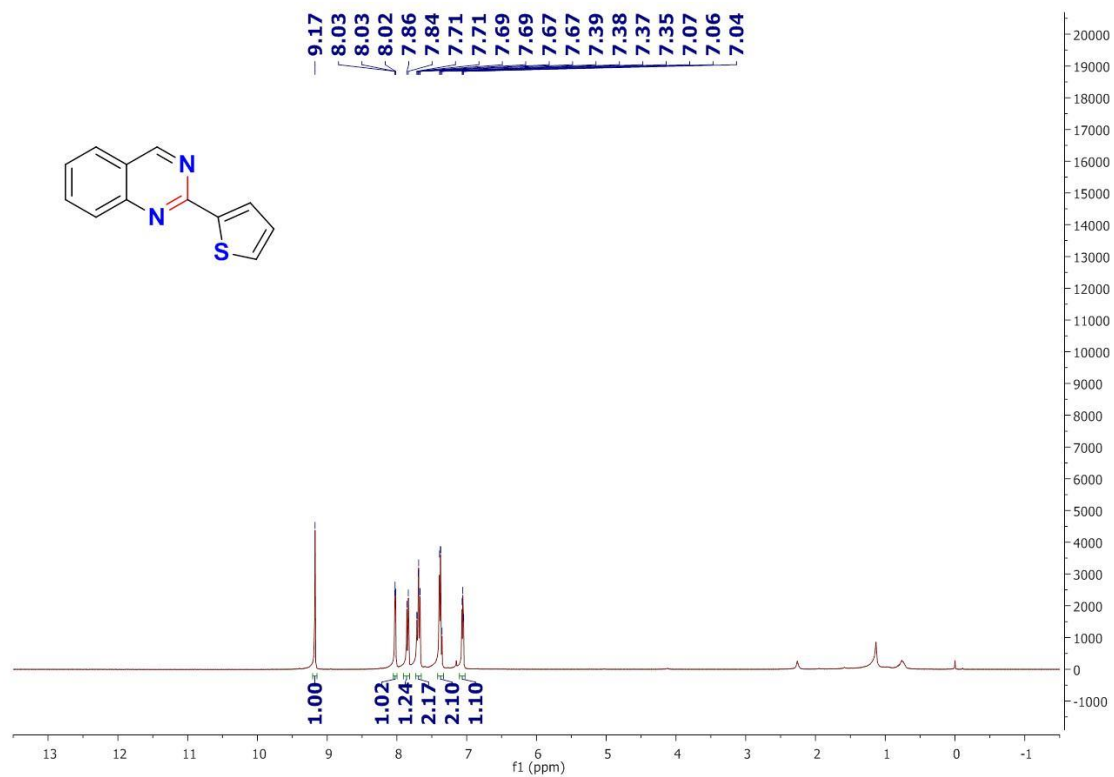

**Figure S27.**  $^1\text{H}$  NMR spectrum of **3k** in  $\text{CDCl}_3$  (400 MHz, 300 K).

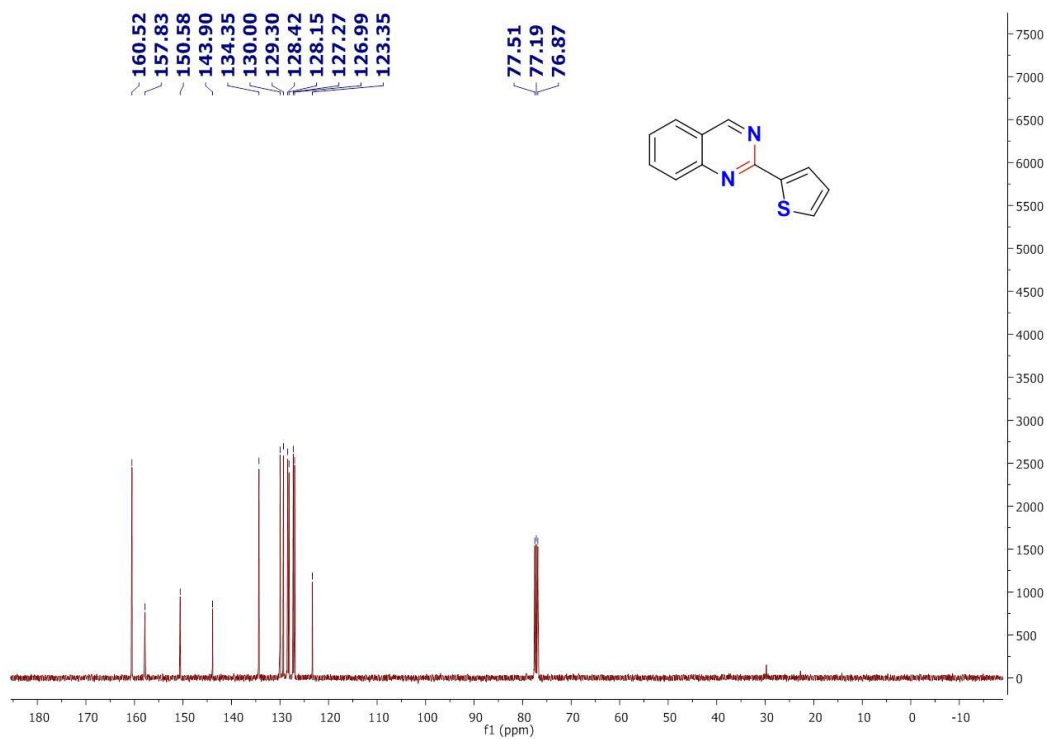

**Figure S28.**  $^{13}\text{C}\{^1\text{H}\}$  NMR spectrum of **3k** in  $\text{CDCl}_3$  (100 MHz, 300 K).

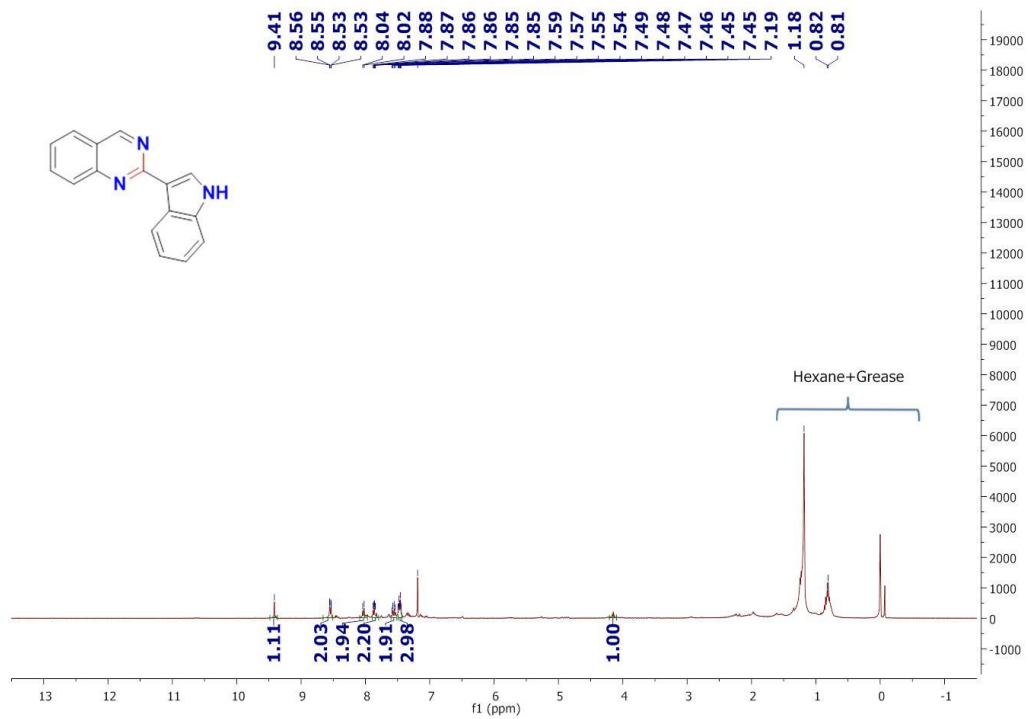

Figure S29.  $^1\text{H}$  NMR spectrum of **3I** in  $\text{CDCl}_3$ (400 MHz, 300 K).

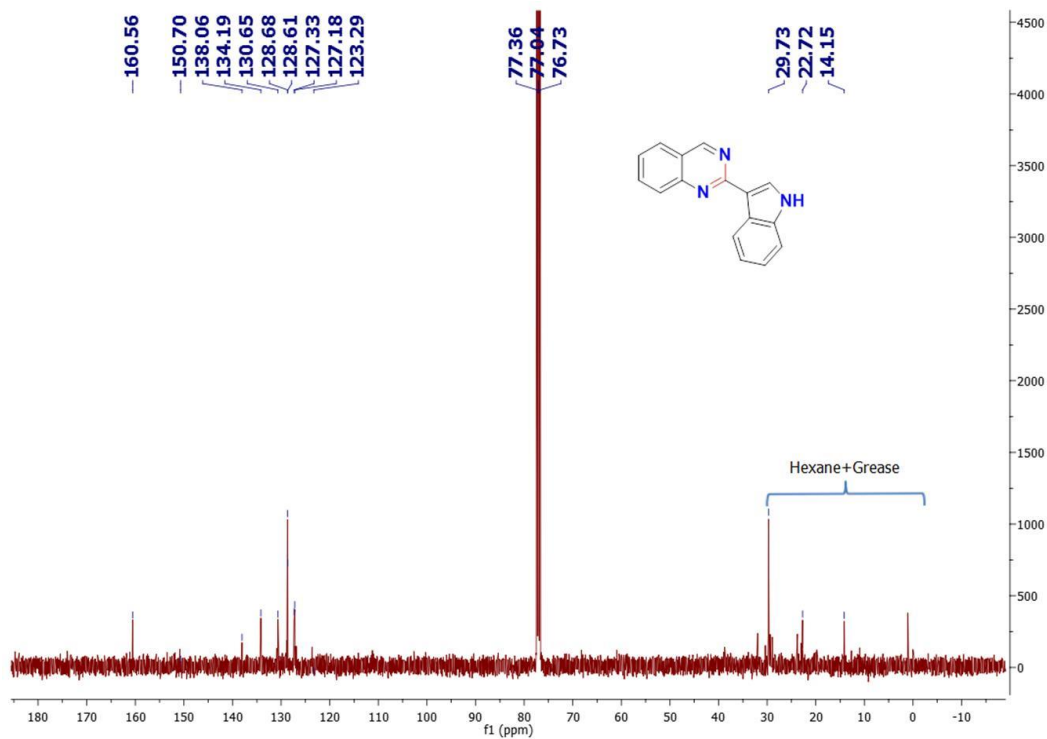

Figure S30.  $^{13}\text{C}\{^1\text{H}\}$  NMR spectrum of **3I** in  $\text{CDCl}_3$ (100 MHz, 300 K).

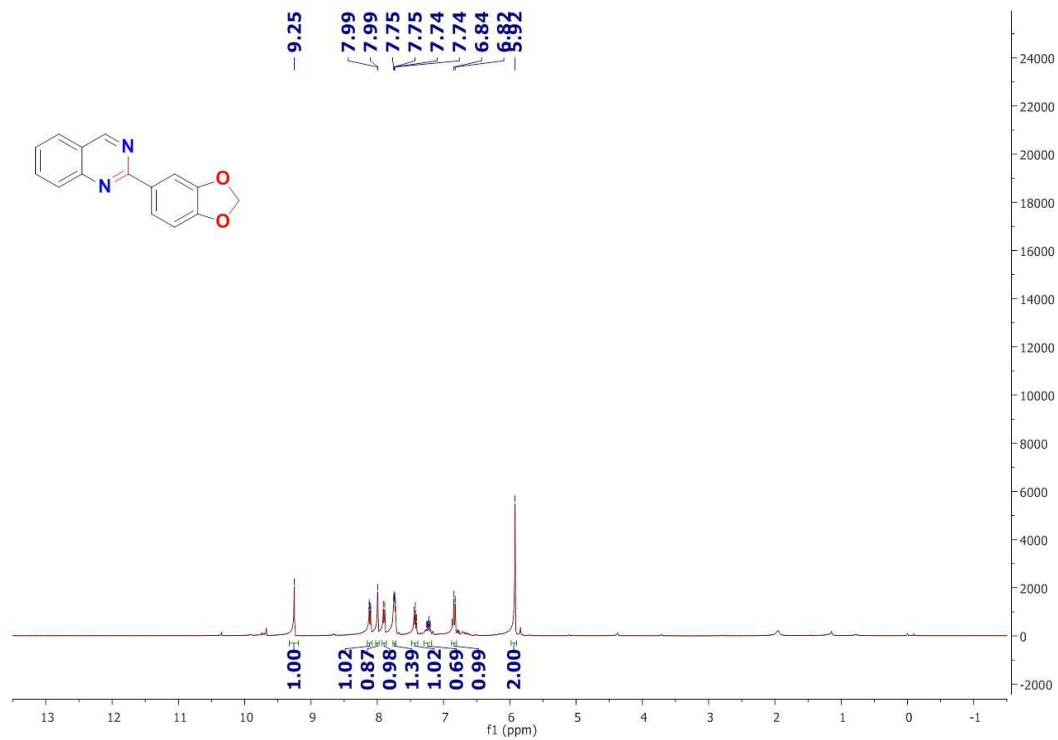

Figure S31.  $^1\text{H}$  NMR spectrum of **3m** in  $\text{CDCl}_3$  (400 MHz, 300 K).

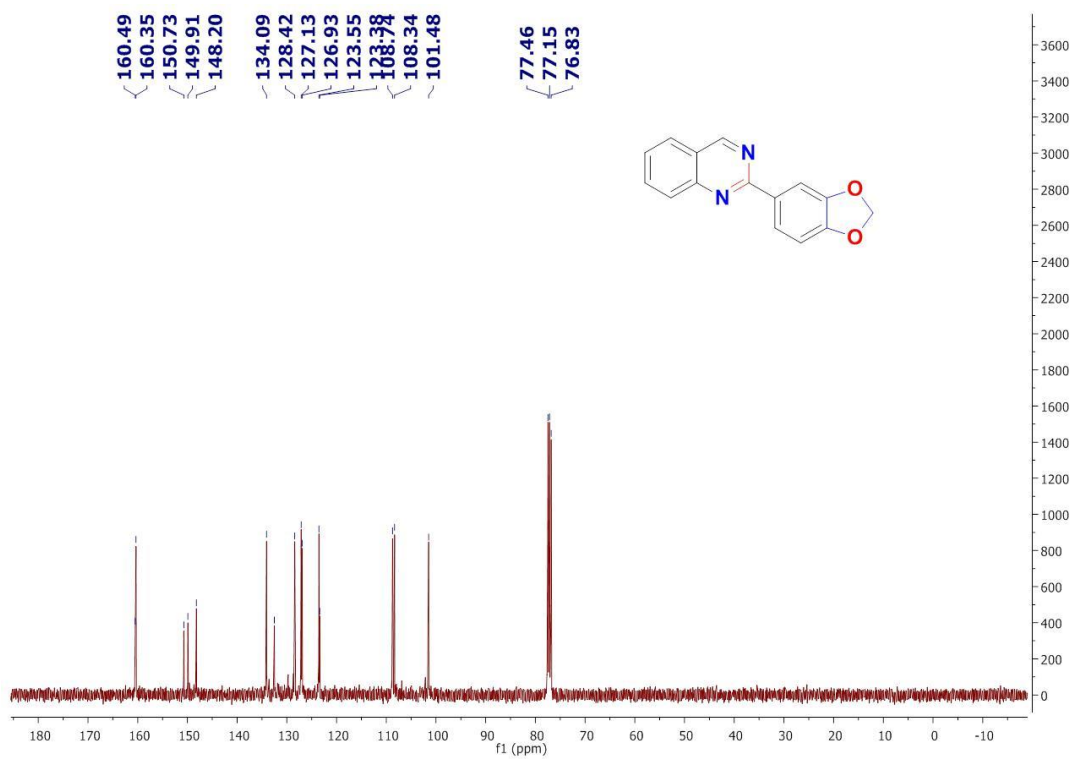

Figure S32.  $^{13}\text{C}\{^1\text{H}\}$  NMR spectrum of **3m** in  $\text{CDCl}_3$  (100 MHz, 300 K).

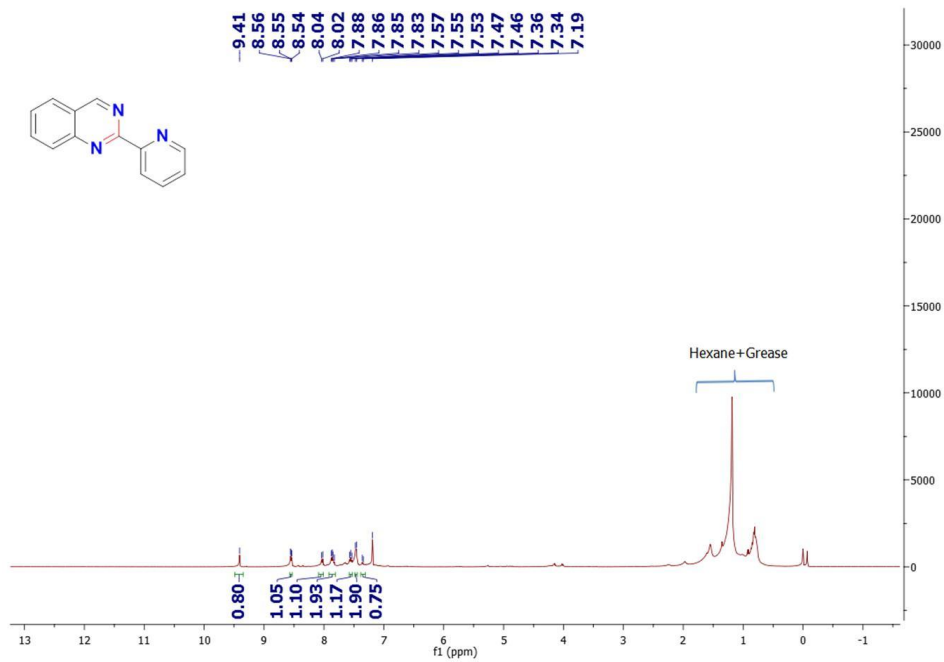

**Figure S33.** <sup>1</sup>H NMR spectrum of **3n** in CDCl<sub>3</sub>(400 MHz, 300 K).

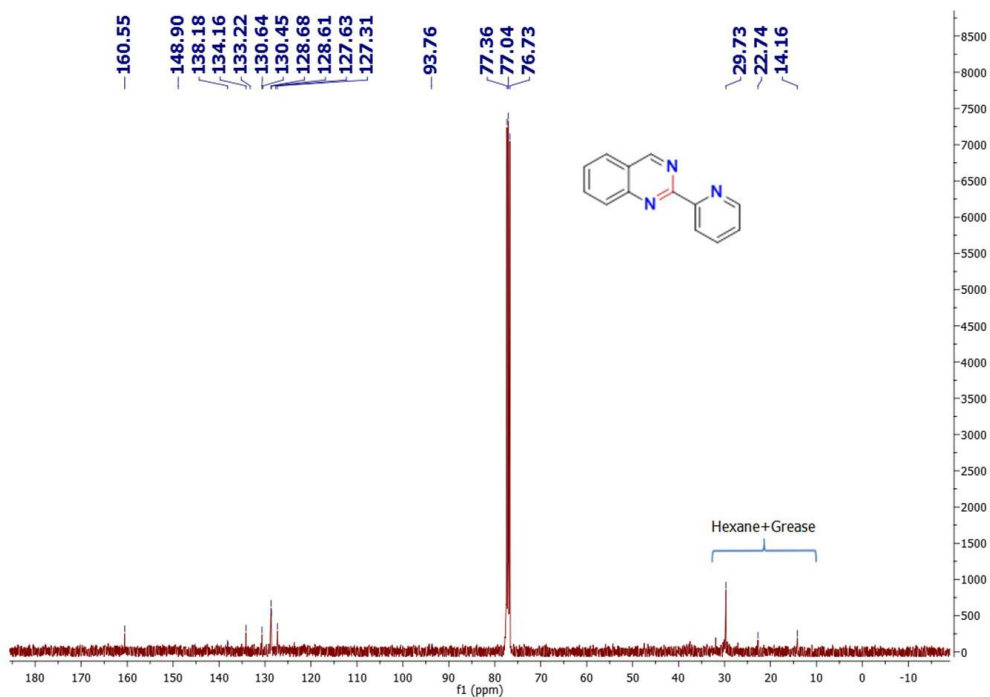

**Figure S34.** <sup>13</sup>C{<sup>1</sup>H} NMR spectrum of **3n** in CDCl<sub>3</sub>(100 MHz, 300 K).

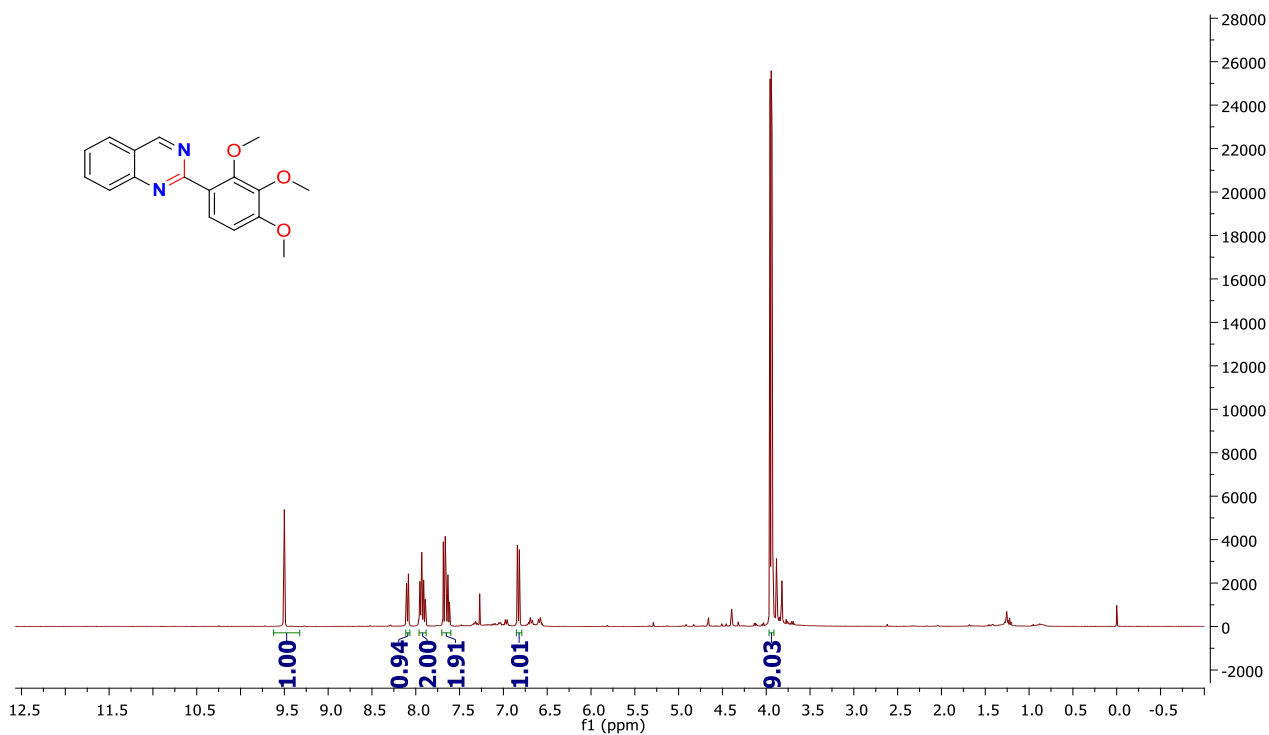

Figure S35.  $^1\text{H}$  NMR spectrum of **3o** in  $\text{CDCl}_3$  (400 MHz, 300 K)

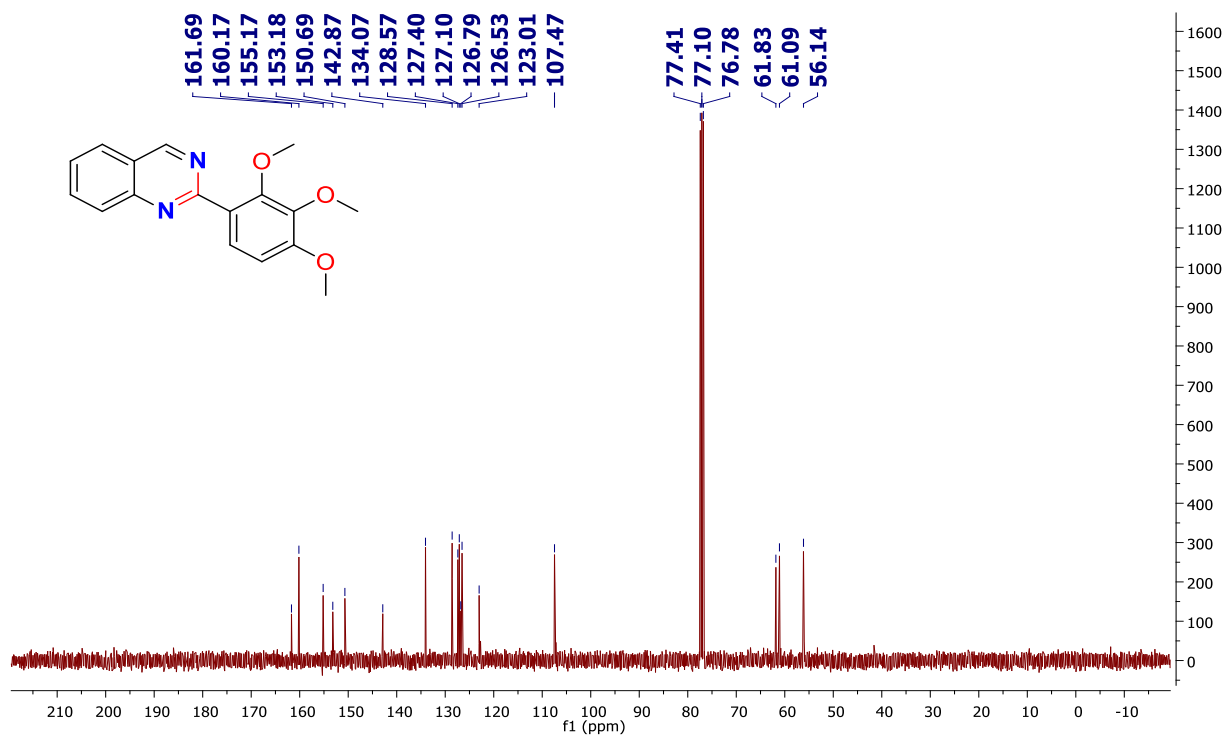

Figure S36.  $^{13}\text{C}\{^1\text{H}\}$  NMR spectrum of **3o** in  $\text{CDCl}_3$  (100 MHz, 300 K).

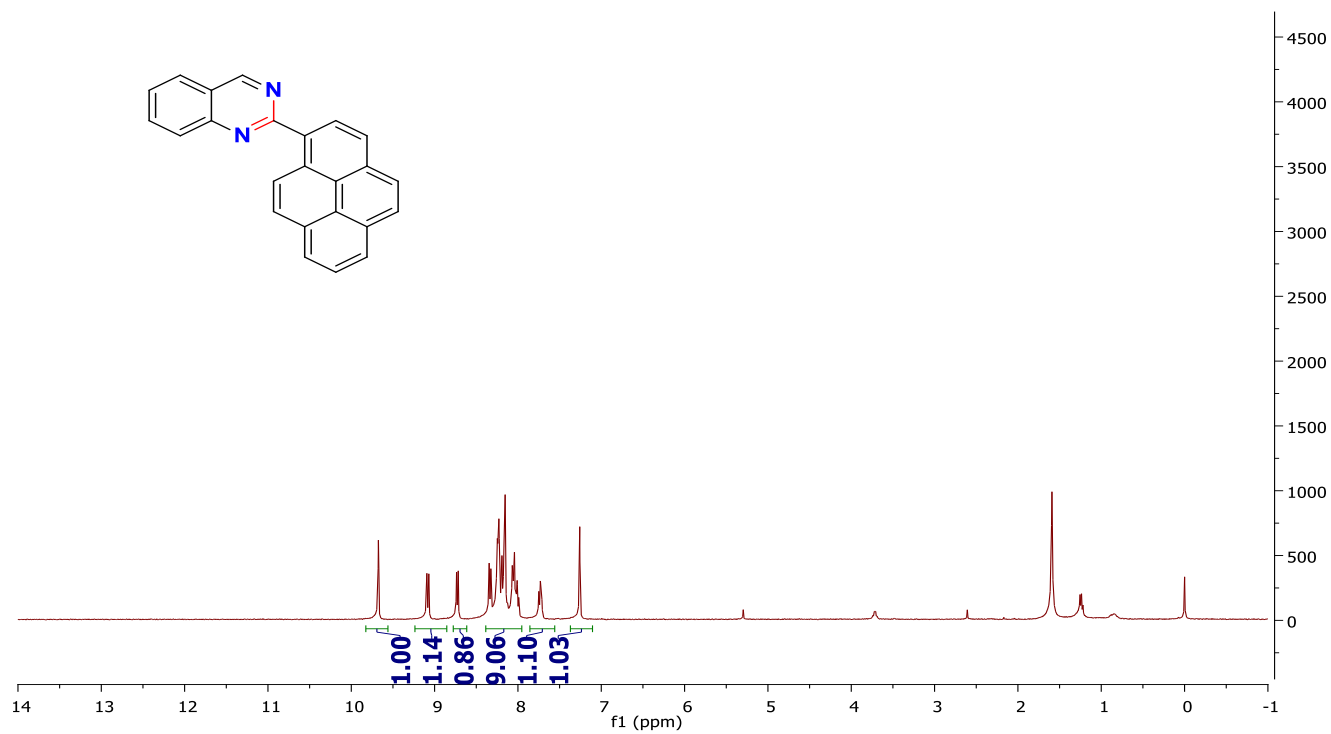

Figure S37. <sup>1</sup>H NMR spectrum of **3p** in CDCl<sub>3</sub>(400 MHz, 300 K).

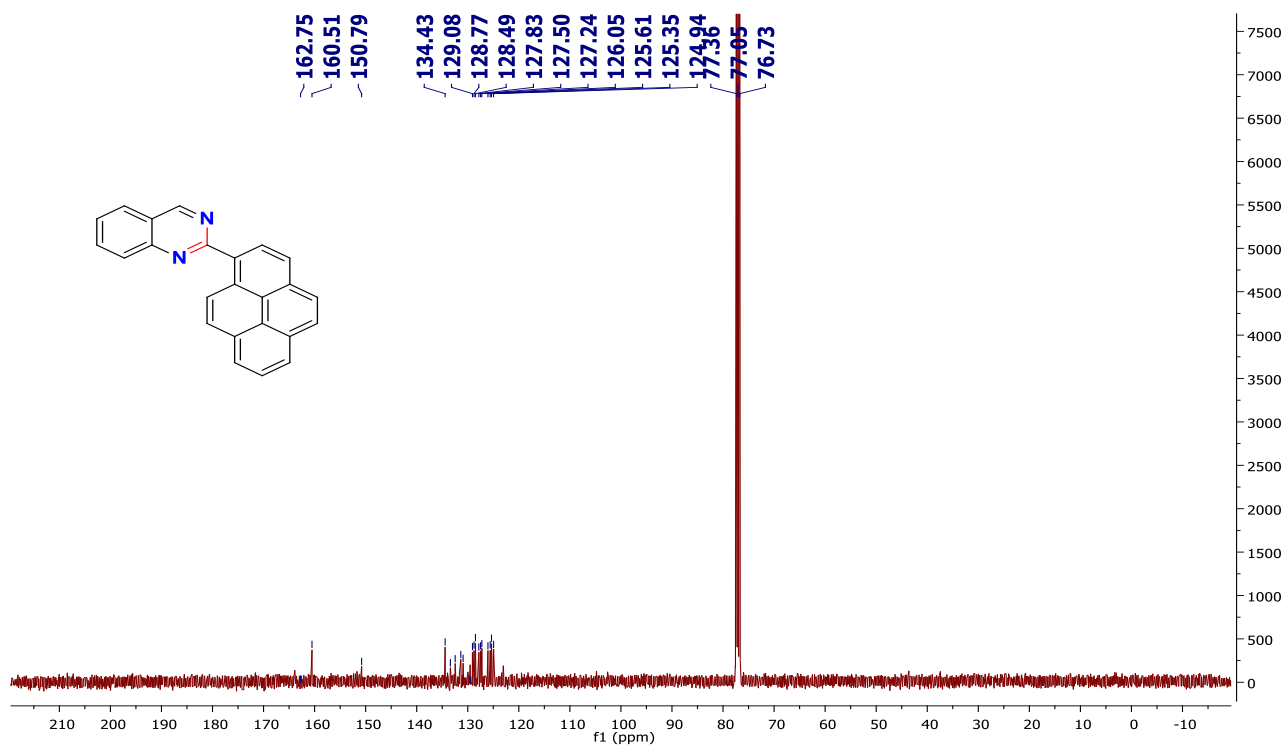

Figure S38. <sup>13</sup>C{<sup>1</sup>H} NMR spectrum of **3p** in CDCl<sub>3</sub>(100 MHz, 300 K).



## 6. Intermediate for aldehydes, quinazoline characterization data and NMR spectra Benzaldehyde(1a')

$^1\text{H}$  NMR (400 MHz,  $\text{CDCl}_3$ )  $\delta$  10.00 (s, 1H), 7.90 – 7.83 (m, 1H), 7.61 (s, 1H), 7.52 (d,  $J = 6.8$  Hz, 1H).

$^{13}\text{C}$  NMR (101 MHz,  $\text{CDCl}_3$ )  $\delta$  192.65, 136.35, 134.56, 133.67, 129.80, 129.03.

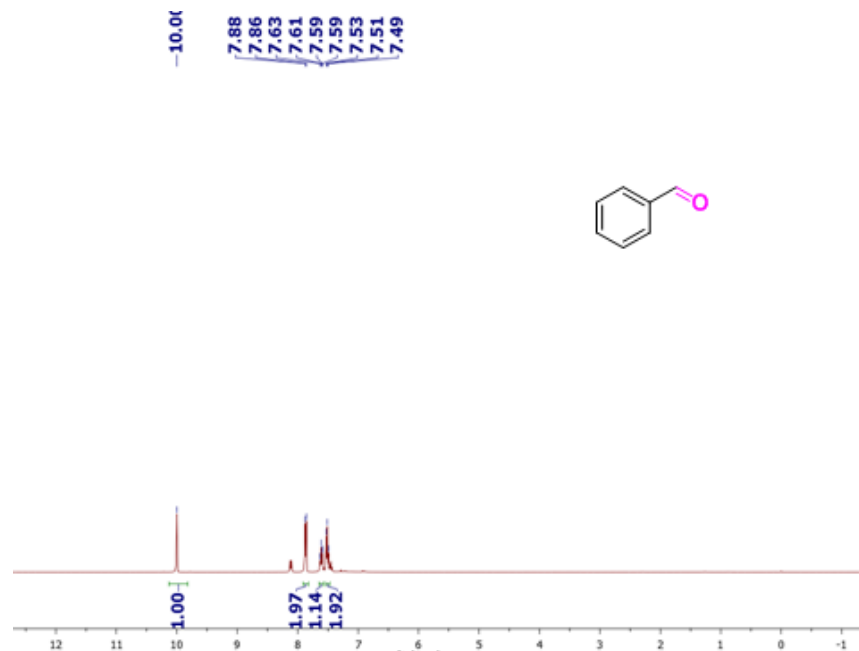

Figure S39.  $^1\text{H}$  NMR spectrum of **1a'** in  $\text{CDCl}_3$  (400 MHz, 300 K).

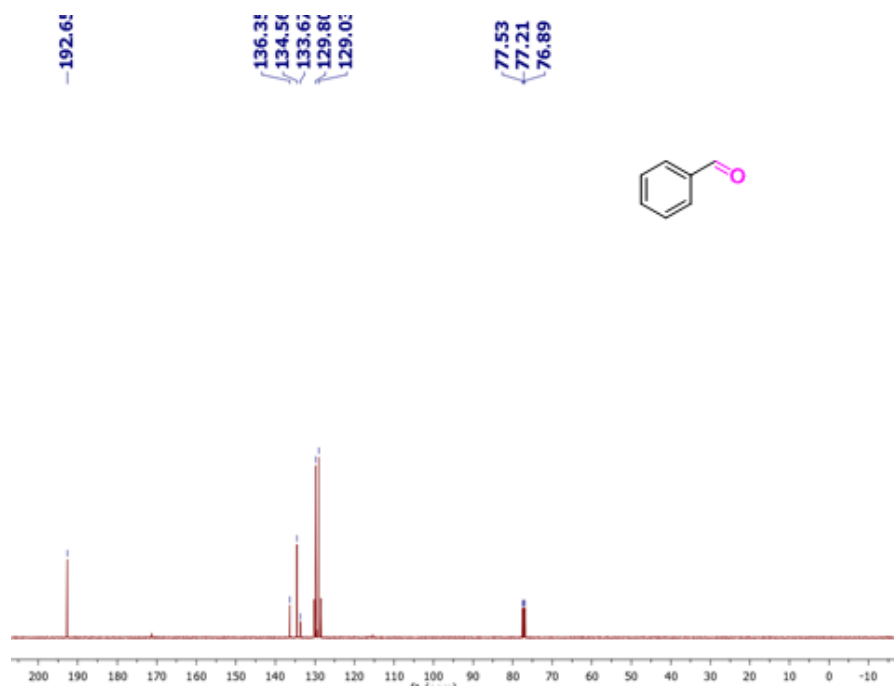

Figure S40.  $^{13}\text{C}\{^1\text{H}\}$  NMR spectrum of **1a'** in  $\text{CDCl}_3$  (100 MHz, 300 K).

Cyclic aminal Intermediate

## 2-phenyl-1,2,3,4-tetrahydroquinazoline (2a')

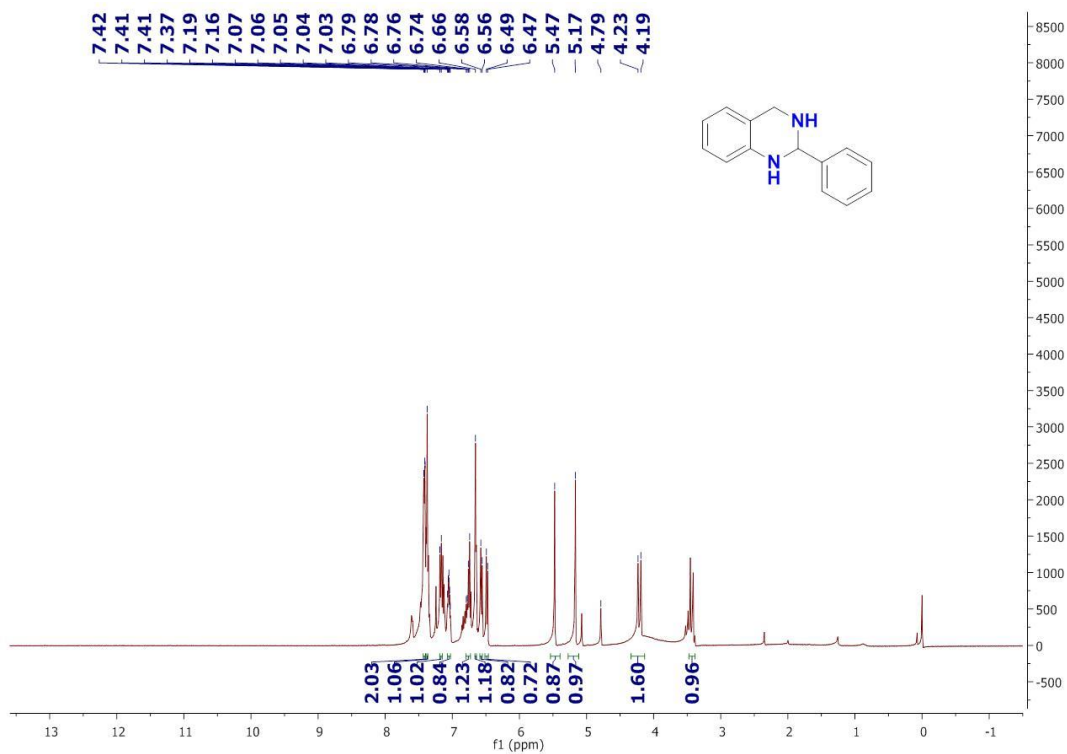

Figure S41. <sup>1</sup>H NMR spectrum of 2a' in CDCl<sub>3</sub> (400 MHz, 300 K).

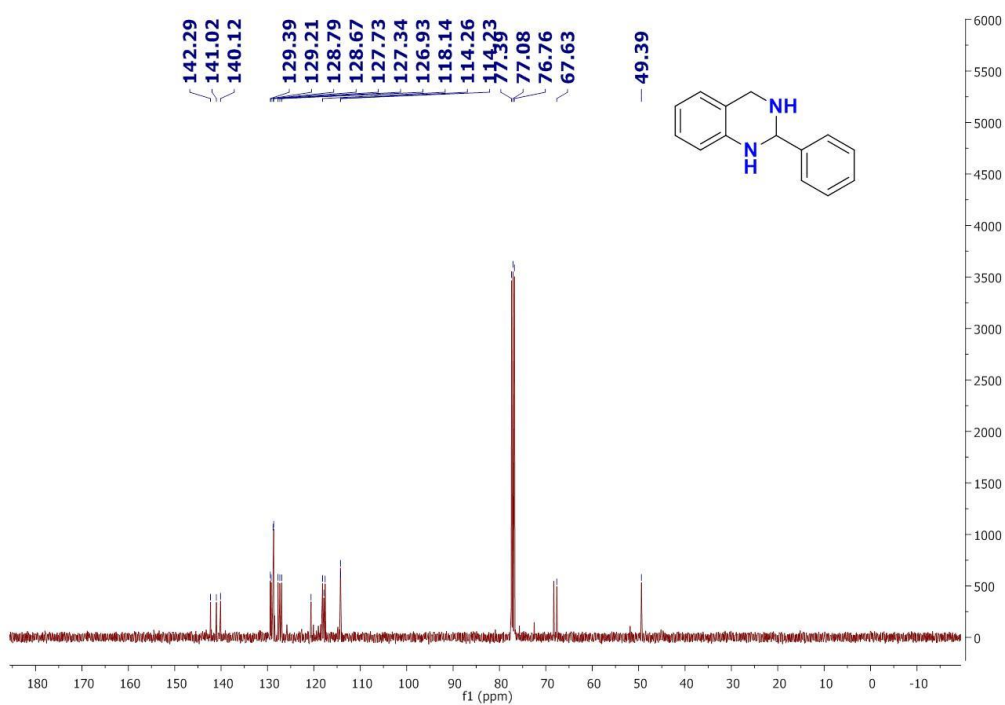

Figure S42. <sup>13</sup>C NMR spectrum of 2a' in CDCl<sub>3</sub> (100 MHz, 300 K).

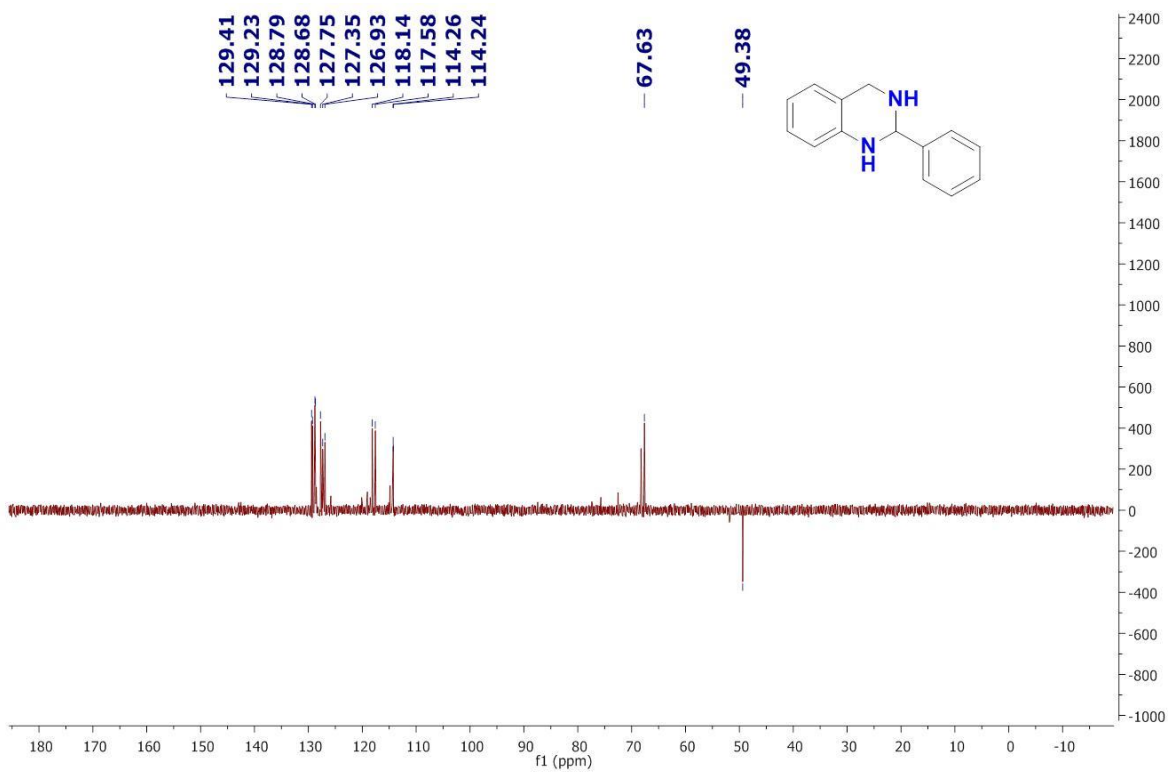

**Figure S43.** DEPT  $^{13}\text{C}$  NMR spectrum of **2a'** in  $\text{CDCl}_3$ (100 MHz, 300 K).

## 7. Mass spectra of quinazoline intermediates

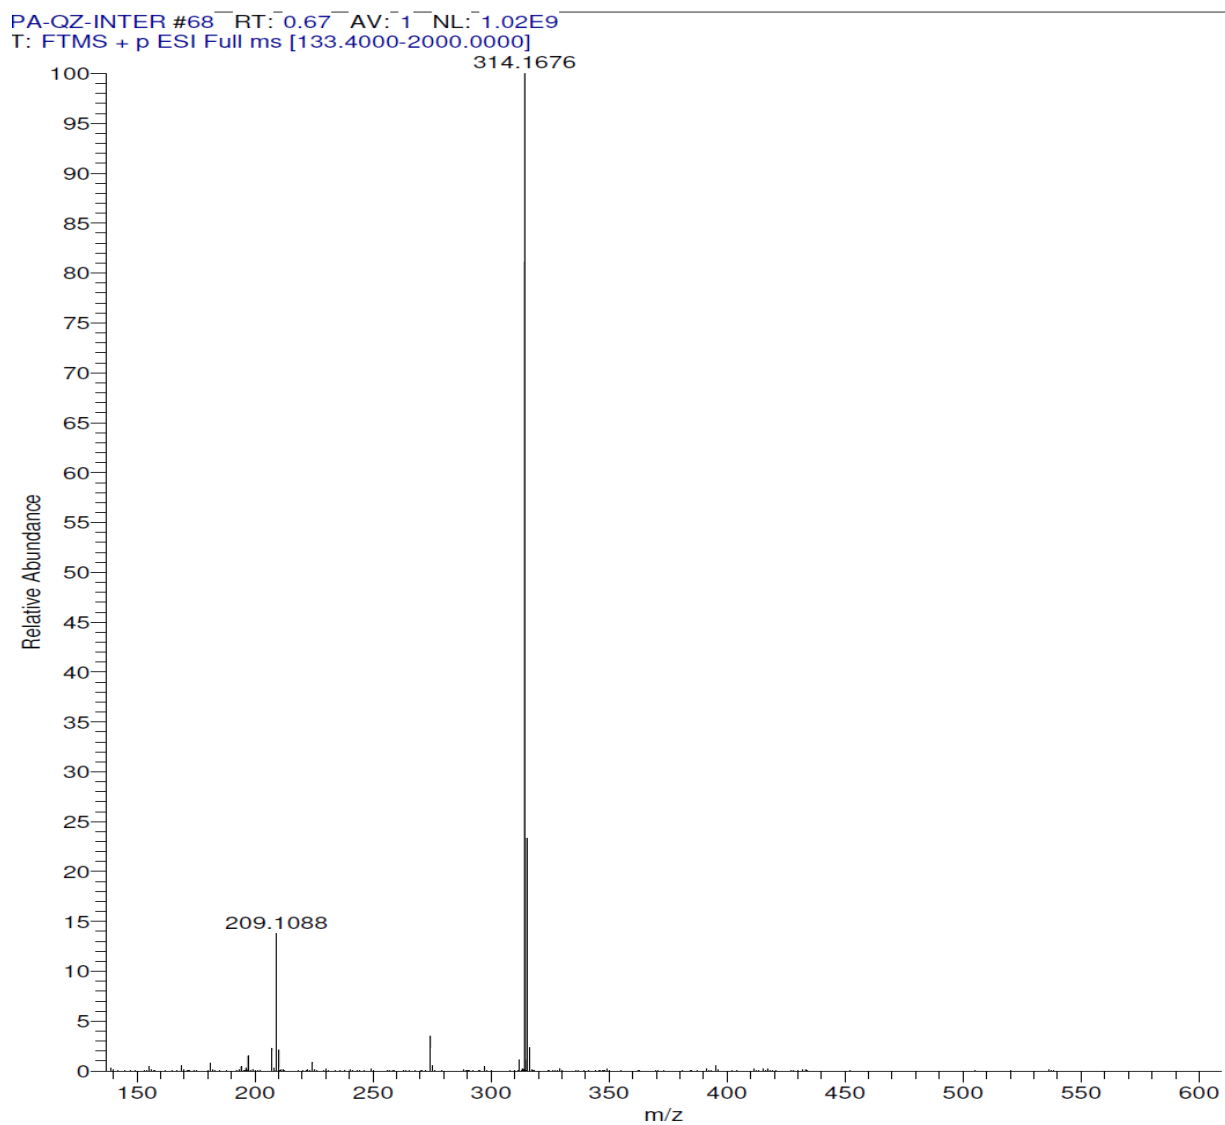

**Figure S44.**HRMS spectrum of **2a'** in methanol.

## 8. References

1. Bruker, APEX2, SAINT, and SADABS, (2006).
2. R.H. Blessing, *J. Appl. Crystallogr.* 1997, **30**, 421- 426.
3. G. M. Sheldrick, *Acta Crystallogr. Sect. A Found. Crystallogr.* 2008, **64**, 112-122.
4. G. M. Sheldrick, *Acta Crystallogr. Sect. C Struct. Chem.* 2015, **71**, 3-8.
5. L.J. Farrugia, *J. Appl. Crystallogr.* 2012, **45**, 849-854.
6. C. F. Macrae, P. R. Edgington, P. McCabe, E. Pidcock, G. P. Shields, R. Taylor, M. Towler and J. V. De Streek, *J. Appl. Crystallogr.* 2006, **39**, 453-457.
